# Supplementary material for: MEF2C controls lysosomal and lipid clearance programs linked to Alzheimer’s disease risk in macrophages
Source: Research Square preprint supplement (doi:10.21203/rs.3.rs-9164252/v1), 2026-04-28
Supplement: Supplementary file 1 [file d72a4a7a3b2dd80be31397df.docx]

**Detailed statistical report for all functional data generated in this manuscript**

**Figure 3: MEF2C loss induces a DLAM-like microglial state and enhanced expression of DAM markers**

**Figure 3B: Cluster proportions in iMGL**

**iMG_0**

We fitted a linear mixed model to predict Proportion with Genotype and Treatment. The model included Clone as random effect. The model's total explanatory power is substantial (conditional R2 = 0.97) and the part related to the fixed effects alone (marginal R2) is of 0.73. The model's intercept is at 0.41 (95% CI [0.36, 0.46]). Within this model:

- The effect of Genotype [WT] is statistically significant and negative (beta = -0.16, 95% CI [-0.22, -0.09], t(10) = -5.05, p < .001, Std. beta = -1.90)

- The effect of Treatment [NT] is statistically non-significant and negative (beta = -0.01, 95% CI [-0.03, 0.01], t(10) = -1.14, p = 0.282, Std. beta = -0.14)

- The effect of Genotype [WT] × Treatment [NT] is statistically significant and positive (beta = 0.03, 95% CI [2.62e-03, 0.07], t(10) = 2.41, p = 0.037, Std.

beta = 0.42)

Emmeans

contrast estimate SE df lower.CL upper.CL t.ratio p.value

KO M - WT M 0.1554 0.0308 6.68 0.0522 0.2586 5.051 0.0070

KO M - KO NT 0.0114 0.0101 6.00 -0.0234 0.0463 1.136 0.6831

KO M - WT NT 0.1325 0.0308 6.68 0.0293 0.2357 4.307 0.0159

WT M - KO NT -0.1440 0.0308 6.68 -0.2472 -0.0408 -4.679 0.0105

WT M - WT NT -0.0229 0.0101 6.00 -0.0577 0.0119 -2.275 0.2059

KO NT - WT NT 0.1211 0.0308 6.68 0.0179 0.2243 3.935 0.0246

Degrees-of-freedom method: kenward-roger

Confidence level used: 0.95

Conf-level adjustment: tukey method for comparing a family of 4 estimates

P value adjustment: tukey method for comparing a family of 4 estimates

**iMG_1**

We fitted a linear mixed model to predict Proportion with Genotype and Treatment. The model included Clone as random effect. The model's total explanatory power is substantial (conditional R2 = 0.69) and the part related to the fixed effects alone (marginal R2) is of 0.41. The model's intercept is at 0.25 (95% CI [0.20, 0.29]). Within this model:

- The effect of Genotype [WT] is statistically non-significant and positive (beta = 0.05, 95% CI [-0.02, 0.11], t(10) = 1.67, p = 0.126, Std. beta = 0.96)

- The effect of Treatment [NT] is statistically non-significant and positive (beta = 0.03, 95% CI [-0.02, 0.08], t(10) = 1.45, p = 0.179, Std. beta = 0.60)

- The effect of Genotype [WT] × Treatment [NT] is statistically non-significant and positive (beta = 0.01, 95% CI [-0.05, 0.08], t(10) = 0.46, p = 0.656, Std.

beta = 0.27)

Emmeans:

contrast estimate SE df lower.CL upper.CL t.ratio p.value

KO M - WT M -0.0476 0.0285 9.76 -0.1352 0.04007 -1.668 0.3887

KO M - KO NT -0.0298 0.0206 6.00 -0.1010 0.04148 -1.447 0.5186

KO M - WT NT -0.0907 0.0285 9.76 -0.1783 -0.00308 -3.181 0.0422

WT M - KO NT 0.0178 0.0285 9.76 -0.0698 0.10541 0.624 0.9221

WT M - WT NT -0.0431 0.0206 6.00 -0.1144 0.02811 -2.096 0.2547

KO NT - WT NT -0.0609 0.0285 9.76 -0.1486 0.02670 -2.137 0.2079

Degrees-of-freedom method: kenward-roger

Confidence level used: 0.95

Conf-level adjustment: tukey method for comparing a family of 4 estimates

P value adjustment: tukey method for comparing a family of 4 estimates

**iMG_2**

We fitted a linear mixed model to predict Proportion with Genotype and Treatment. The model included Clone as random effect. The model's total explanatory power is substantial (conditional R2 = 0.73) and the part related to the fixed effects alone (marginal R2) is of 0.65. The model's intercept is at 0.20 (95% CI [0.16, 0.24]). Within this model:

- The effect of Genotype [WT] is statistically significant and positive (beta = 0.09, 95% CI [0.03, 0.15], t(10) = 3.60, p = 0.005, Std. beta = 1.56)

- The effect of Treatment [NT] is statistically non-significant and negative (beta = -0.04, 95% CI [-0.09, 0.01], t(10) = -1.74, p = 0.112, Std. beta = -0.66)

- The effect of Genotype [WT] × Treatment [NT] is statistically non-significant and negative (beta = -0.03, 95% CI [-0.09, 0.04], t(10) = -0.80, p = 0.443,

Std. beta = -0.43)

Emmeans

contrast estimate SE df lower.CL upper.CL t.ratio p.value

KO M - WT M -0.0906 0.0251 11.4 -0.1658 -0.0154 -3.601 0.0176

KO M - KO NT 0.0386 0.0222 6.0 -0.0382 0.1154 1.740 0.3822

KO M - WT NT -0.0269 0.0251 11.4 -0.1021 0.0483 -1.070 0.7137

WT M - KO NT 0.1292 0.0251 11.4 0.0540 0.2044 5.137 0.0014

WT M - WT NT 0.0637 0.0222 6.0 -0.0131 0.1405 2.870 0.1006

KO NT - WT NT -0.0655 0.0251 11.4 -0.1407 0.0097 -2.605 0.0952

Degrees-of-freedom method: kenward-roger

Confidence level used: 0.95

Conf-level adjustment: tukey method for comparing a family of 4 estimates

P value adjustment: tukey method for comparing a family of 4 estimates

**iMG_3**

We fitted a linear mixed model to predict Proportion with Genotype and Treatment. The model included Clone as random effect. The model's total explanatory power is substantial (conditional R2 = 0.76) and the part related to the fixed effects alone (marginal R2) is of 0.33. The model's intercept is at 0.06 (95% CI [0.04, 0.08]). Within this model:

- The effect of Genotype [WT] is statistically significant and positive (beta = 0.03, 95% CI [2.31e-03, 0.05], t(10) = 2.44, p = 0.035, Std. beta = 1.52)

- The effect of Treatment [NT] is statistically non-significant and positive (beta = 0.01, 95% CI [-4.18e-03, 0.02], t(10) = 1.58, p = 0.145, Std. beta =

0.58)

- The effect of Genotype [WT] × Treatment [NT] is statistically non-significant and negative (beta = -0.01, 95% CI [-0.03, 5.59e-03], t(10) = -1.61, p =

0.137, Std. beta = -0.84)

Emmeans:

contrast estimate SE df lower.CL upper.CL t.ratio p.value

KO M - WT M -0.02650 0.01090 8.45 -0.0608 0.00784 -2.441 0.1421

KO M - KO NT -0.01017 0.00644 6.00 -0.0325 0.01212 -1.579 0.4537

KO M - WT NT -0.02197 0.01090 8.45 -0.0563 0.01238 -2.023 0.2526

WT M - KO NT 0.01633 0.01090 8.45 -0.0180 0.05067 1.504 0.4758

WT M - WT NT 0.00453 0.00644 6.00 -0.0178 0.02682 0.704 0.8920

KO NT - WT NT -0.01180 0.01090 8.45 -0.0461 0.02254 -1.087 0.7062

Degrees-of-freedom method: kenward-roger

Confidence level used: 0.95

Conf-level adjustment: tukey method for comparing a family of 4 estimates

P value adjustment: tukey method for comparing a family of 4 estimates

**iMG_4**

We fitted a linear mixed model to predict Proportion with Genotype and Treatment. The model included Clone as random effect. The model's total explanatory power is substantial (conditional R2 = 0.97) and the part related to the fixed effects alone (marginal R2) is of 0.01. The model's intercept is at 0.04 (95% CI [0.02, 0.07]). Within this model:

- The effect of Genotype [WT] is statistically non-significant and negative (beta = -4.15e-03, 95% CI [-0.04, 0.04], t(10) = -0.23, p = 0.822, Std. beta =

-0.18)

- The effect of Treatment [NT] is statistically non-significant and positive (beta = 2.94e-03, 95% CI [-3.58e-03, 9.46e-03], t(10) = 1.01, p = 0.338, Std.

beta = 0.13)

- The effect of Genotype [WT] × Treatment [NT] is statistically non-significant and positive (beta = 1.89e-03, 95% CI [-7.33e-03, 0.01], t(10) = 0.46, p =

0.658, Std. beta = 0.08)

Emmeans

contrast estimate SE df lower.CL upper.CL t.ratio p.value

KO M - WT M 0.004148 0.01800 6.16 -0.0577 0.06598 0.230 0.9952

KO M - KO NT -0.002941 0.00292 6.00 -0.0131 0.00718 -1.005 0.7526

KO M - WT NT -0.000681 0.01800 6.16 -0.0625 0.06115 -0.038 1.0000

WT M - KO NT -0.007088 0.01800 6.16 -0.0689 0.05474 -0.394 0.9775

WT M - WT NT -0.004829 0.00292 6.00 -0.0150 0.00530 -1.651 0.4208

KO NT - WT NT 0.002259 0.01800 6.16 -0.0596 0.06409 0.125 0.9992

Degrees-of-freedom method: kenward-roger

Confidence level used: 0.95

Conf-level adjustment: tukey method for comparing a family of 4 estimates

P value adjustment: tukey method for comparing a family of 4 estimates

**iMG_5**

We fitted a linear mixed model to predict Proportion with Genotype and Treatment. The model included Clone as random effect. The model's total explanatory power is substantial (conditional R2 = 0.97) and the part related to the fixed effects alone (marginal R2) is of 0.51. The model's intercept is at 0.03 (95% CI [0.02, 0.04]). Within this model:

- The effect of Genotype [WT] is statistically significant and negative (beta = -0.01, 95% CI [-0.02, -1.98e-03], t(10) = -2.64, p = 0.025, Std. beta = -1.38)

- The effect of Treatment [NT] is statistically non-significant and positive (beta = 2.30e-03, 95% CI [-3.71e-04, 4.96e-03], t(10) = 1.92, p = 0.084, Std.

beta = 0.25)

- The effect of Genotype [WT] × Treatment [NT] is statistically non-significant and negative (beta = -1.24e-03, 95% CI [-5.01e-03, 2.53e-03], t(10) = -0.73, p

= 0.481, Std. beta = -0.14)

Emmeans

contrast estimate SE df lower.CL upper.CL t.ratio p.value

KO M - WT M 0.01264 0.00479 6.39 -0.00361 0.02889 2.642 0.1271

KO M - KO NT -0.00230 0.00120 6.00 -0.00644 0.00185 -1.918 0.3132

KO M - WT NT 0.01158 0.00479 6.39 -0.00467 0.02784 2.421 0.1674

WT M - KO NT -0.01494 0.00479 6.39 -0.03119 0.00131 -3.122 0.0699

WT M - WT NT -0.00106 0.00120 6.00 -0.00520 0.00309 -0.882 0.8143

KO NT - WT NT 0.01388 0.00479 6.39 -0.00237 0.03013 2.901 0.0919

Degrees-of-freedom method: kenward-roger

Confidence level used: 0.95

Conf-level adjustment: tukey method for comparing a family of 4 estimates

P value adjustment: tukey method for comparing a family of 4 estimates

**iMG_6**

We fitted a linear mixed model to predict Proportion with Genotype and Treatment. The model included Clone as random effect. The model's total explanatory power is substantial (conditional R2 = 0.72) and the part related to the fixed effects alone (marginal R2) is of 0.10. The model's intercept is at 3.08e-03 (95% CI [-5.18e-03, 0.01]). Within this model:

- The effect of Genotype [WT] is statistically non-significant and positive (beta = 6.28e-03, 95% CI [-5.39e-03, 0.02], t(10) = 1.20, p = 0.258, Std. beta =

0.89)

- The effect of Treatment [NT] is statistically non-significant and positive (beta = 4.84e-03, 95% CI [-1.60e-03, 0.01], t(10) = 1.67, p = 0.125, Std. beta =

0.69)

- The effect of Genotype [WT] × Treatment [NT] is statistically non-significant and negative (beta = -7.78e-03, 95% CI [-0.02, 1.33e-03], t(10) = -1.90, p =

0.086, Std. beta = -1.10)

Emmeans

contrast estimate SE df lower.CL upper.CL t.ratio p.value

KO M - WT M -0.00628 0.00524 8.08 -0.02302 0.01046 -1.199 0.6442

KO M - KO NT -0.00484 0.00289 6.00 -0.01484 0.00516 -1.674 0.4105

KO M - WT NT -0.00334 0.00524 8.08 -0.02008 0.01339 -0.638 0.9169

WT M - KO NT 0.00144 0.00524 8.08 -0.01529 0.01818 0.276 0.9921

WT M - WT NT 0.00294 0.00289 6.00 -0.00706 0.01294 1.017 0.7464

KO NT - WT NT 0.00150 0.00524 8.08 -0.01524 0.01823 0.285 0.9913

Degrees-of-freedom method: kenward-roger

Confidence level used: 0.95

Conf-level adjustment: tukey method for comparing a family of 4 estimates

P value adjustment: tukey method for comparing a family of 4 estimates

**iMG_7**

We fitted a linear mixed model to predict Proportion with Genotype and Treatment. The model included Clone as random effect. The model's explanatory power related to the fixed effects alone (marginal R2) is 0.37. The model's intercept is at 4.93e-03 (95% CI [2.57e-03, 7.28e-03]). Within this model:

- The effect of Genotype [WT] is statistically non-significant and negative (beta = -2.48e-03, 95% CI [-5.81e-03, 8.45e-04], t(10) = -1.66, p = 0.127, Std.

beta = -1.15)

- The effect of Treatment [NT] is statistically non-significant and negative (beta = -3.50e-04, 95% CI [-2.51e-03, 1.81e-03], t(10) = -0.36, p = 0.726, Std.

beta = -0.16)

- The effect of Genotype [WT] × Treatment [NT] is statistically non-significant and positive (beta = 9.77e-04, 95% CI [-2.08e-03, 4.04e-03], t(10) = 0.71, p =

0.493, Std. beta = 0.45)

Emmeans

contrast estimate SE df lower.CL upper.CL t.ratio p.value

KO M - WT M 0.002482 0.001490 9 -0.00218 0.00714 1.662 0.3949

KO M - KO NT 0.000350 0.000971 6 -0.00301 0.00371 0.360 0.9825

KO M - WT NT 0.001855 0.001490 9 -0.00281 0.00652 1.242 0.6180

WT M - KO NT -0.002132 0.001490 9 -0.00679 0.00253 -1.428 0.5144

WT M - WT NT -0.000627 0.000971 6 -0.00399 0.00274 -0.646 0.9133

KO NT - WT NT 0.001505 0.001490 9 -0.00316 0.00617 1.008 0.7491

Degrees-of-freedom method: kenward-roger

Confidence level used: 0.95

Conf-level adjustment: tukey method for comparing a family of 4 estimates

P value adjustment: tukey method for comparing a family of 4 estimates

**iMG_8**

We fitted a linear mixed model to predict Proportion with Genotype and Treatment. The model included Clone as random effect. The model's explanatory power

related to the fixed effects alone (marginal R2) is 0.65. The model's intercept is at 1.29e-03 (95% CI [-2.12e-04, 2.79e-03]). Within this model:

- The effect of Genotype [WT] is statistically non-significant and positive (beta = 1.46e-03, 95% CI [-6.60e-04, 3.59e-03], t(10) = 1.54, p = 0.156, Std. beta

= 1.00)

- The effect of Treatment [NT] is statistically non-significant and positive (beta = 3.71e-04, 95% CI [-5.92e-04, 1.33e-03], t(10) = 0.86, p = 0.411, Std.

beta = 0.25)

- The effect of Genotype [WT] × Treatment [NT] is statistically non-significant and positive (beta = 1.83e-04, 95% CI [-1.18e-03, 1.54e-03], t(10) = 0.30, p =

0.771, Std. beta = 0.12)

Emmeans

contrast estimate SE df lower.CL upper.CL t.ratio p.value

KO M - WT M -0.001464 0.000953 7.36 -0.00458 0.001650 -1.536 0.4650

KO M - KO NT -0.000371 0.000432 6.00 -0.00187 0.001125 -0.859 0.8255

KO M - WT NT -0.002018 0.000953 7.36 -0.00513 0.001096 -2.117 0.2324

WT M - KO NT 0.001093 0.000953 7.36 -0.00202 0.004207 1.147 0.6746

WT M - WT NT -0.000554 0.000432 6.00 -0.00205 0.000943 -1.281 0.6052

KO NT - WT NT -0.001647 0.000953 7.36 -0.00476 0.001468 -1.728 0.3752

Degrees-of-freedom method: kenward-roger

Confidence level used: 0.95

Conf-level adjustment: tukey method for comparing a family of 4 estimates

P value adjustment: tukey method for comparing a family of 4 estimates

**iMG_9**

We fitted a linear mixed model to predict Proportion with Genotype and Treatment. The model included Clone as random effect. The model's explanatory power

related to the fixed effects alone (marginal R2) is 0.65. The model's intercept is at 1.29e-03 (95% CI [-2.12e-04, 2.79e-03]). Within this model:

- The effect of Genotype [WT] is statistically non-significant and positive (beta = 1.46e-03, 95% CI [-6.60e-04, 3.59e-03], t(10) = 1.54, p = 0.156, Std. beta

= 1.00)

- The effect of Treatment [NT] is statistically non-significant and positive (beta = 3.71e-04, 95% CI [-5.92e-04, 1.33e-03], t(10) = 0.86, p = 0.411, Std.

beta = 0.25)

- The effect of Genotype [WT] × Treatment [NT] is statistically non-significant and positive (beta = 1.83e-04, 95% CI [-1.18e-03, 1.54e-03], t(10) = 0.30, p =

0.771, Std. beta = 0.12)

Emmeans:

contrast estimate SE df lower.CL upper.CL t.ratio p.value

KO M - WT M -0.001464 0.000953 7.36 -0.00458 0.001650 -1.536 0.4650

KO M - KO NT -0.000371 0.000432 6.00 -0.00187 0.001125 -0.859 0.8255

KO M - WT NT -0.002018 0.000953 7.36 -0.00513 0.001096 -2.117 0.2324

WT M - KO NT 0.001093 0.000953 7.36 -0.00202 0.004207 1.147 0.6746

WT M - WT NT -0.000554 0.000432 6.00 -0.00205 0.000943 -1.281 0.6052

KO NT - WT NT -0.001647 0.000953 7.36 -0.00476 0.001468 -1.728 0.3752

Degrees-of-freedom method: kenward-roger

Confidence level used: 0.95

Conf-level adjustment: tukey method for comparing a family of 4 estimates

P value adjustment: tukey method for comparing a family of 4 estimates

**Figure 3E: DAM score in iMGL**

We fitted a linear mixed model to predict mean_module with Genotype and Treatment. The model included clone as random effect. The model's total explanatory

power is substantial (conditional R2 = 0.97) and the part related to the fixed effects alone (marginal R2) is of 0.55. The model's intercept is at 0.37 (95%

CI [0.30, 0.43]).

Within this model:

- The effect of Genotype [WT] is statistically significant and negative (beta = -0.12, 95% CI [-0.21, -0.03], t(10) = -2.88, p = 0.016, Std. beta = -1.43)

- The effect of Treatment [NT] is statistically significant and negative (beta = -0.03, 95% CI [-0.06, -6.70e-03], t(10) = -2.84, p = 0.017, Std. beta =

-0.37)

- The effect of Genotype [WT] × Treatment [NT] is statistically non-significant and negative (beta = -3.64e-03, 95% CI [-0.04, 0.03], t(10) = -0.24, p =

0.818, Std. beta = -0.04)

contrast estimate SE df lower.CL upper.CL t.ratio p.value

KO M - WT M 0.1190 0.0413 6.43 -0.02098 0.2591 2.881 0.0937

KO M - KO NT 0.0310 0.0109 6.00 -0.00673 0.0687 2.843 0.1038

KO M - WT NT 0.1536 0.0413 6.43 0.01363 0.2937 3.719 0.0337

WT M - KO NT -0.0881 0.0413 6.43 -0.22808 0.0520 -2.132 0.2385

WT M - WT NT 0.0346 0.0109 6.00 -0.00310 0.0723 3.178 0.0697

KO NT - WT NT 0.1227 0.0413 6.43 -0.01734 0.2627 2.970 0.0839

Degrees-of-freedom method: kenward-roger

Confidence level used: 0.95

Conf-level adjustment: tukey method for comparing a family of 4 estimates

P value adjustment: tukey method for comparing a family of 4 estimates

**Figure 3F: MHCII/Homeostatic score in iMGL**

We fitted a linear mixed model to predict mean_module with Genotype and Treatment. The model included clone as random effect. The model's total explanatory

power is substantial (conditional R2 = 0.88) and the part related to the fixed effects alone (marginal R2) is of 0.71. The model's intercept is at 0.40 (95%

CI [0.35, 0.45]).

Within this model:

- The effect of Genotype [WT] is statistically significant and positive (beta = 0.13, 95% CI [0.06, 0.19], t(10) = 4.17, p = 0.002, Std. beta = 1.62)

- The effect of Treatment [NT] is statistically non-significant and positive (beta = 0.01, 95% CI [-0.03, 0.06], t(10) = 0.64, p = 0.538, Std. beta = 0.16)

- The effect of Genotype [WT] × Treatment [NT] is statistically non-significant and positive (beta = 7.81e-03, 95% CI [-0.05, 0.07], t(10) = 0.29, p = 0.781,

Std. beta = 0.10)

Emmeans

contrast estimate SE df lower.CL upper.CL t.ratio p.value

KO M - WT M -0.1267 0.0304 8.85 -0.2219 -0.0315 -4.171 0.0110

KO M - KO NT -0.0123 0.0193 6.00 -0.0791 0.0545 -0.638 0.9159

KO M - WT NT -0.1468 0.0304 8.85 -0.2420 -0.0517 -4.833 0.0044

WT M - KO NT 0.1144 0.0304 8.85 0.0192 0.2095 3.765 0.0196

WT M - WT NT -0.0201 0.0193 6.00 -0.0869 0.0467 -1.043 0.7329

KO NT - WT NT -0.1345 0.0304 8.85 -0.2297 -0.0393 -4.428 0.0076

Degrees-of-freedom method: kenward-roger

Confidence level used: 0.95

Conf-level adjustment: tukey method for comparing a family of 4 estimates

P value adjustment: tukey method for comparing a family of 4 estimates

**Figure 3G: BAM score in iMGL**

We fitted a linear mixed model to predict mean_module with Genotype and Treatment. The model included clone as random effect. The model's total explanatory

power is substantial (conditional R2 = 0.98) and the part related to the fixed effects alone (marginal R2) is of 0.69. The model's intercept is at 0.11 (95%

CI [0.05, 0.18]).

Within this model:

- The effect of Genotype [WT] is statistically significant and negative (beta = -0.17, 95% CI [-0.26, -0.08], t(10) = -4.20, p = 0.002, Std. beta = -1.69)

- The effect of Treatment [NT] is statistically significant and negative (beta = -0.03, 95% CI [-0.05, -6.89e-03], t(10) = -2.92, p = 0.015, Std. beta =

-0.29)

- The effect of Genotype [WT] × Treatment [NT] is statistically non-significant and positive (beta = 9.47e-03, 95% CI [-0.02, 0.04], t(10) = 0.67, p = 0.516,

Std. beta = 0.09)

Emmeans

contrast estimate SE df lower.CL upper.CL t.ratio p.value

KO M - WT M 0.1695 0.04030 6.38 0.03243 0.30660 4.202 0.0196

KO M - KO NT 0.0290 0.00994 6.00 -0.00538 0.06346 2.921 0.0946

KO M - WT NT 0.1891 0.04030 6.38 0.05200 0.32617 4.687 0.0116

WT M - KO NT -0.1405 0.04030 6.38 -0.27755 -0.00339 -3.482 0.0452

WT M - WT NT 0.0196 0.00994 6.00 -0.01485 0.05399 1.968 0.2956

KO NT - WT NT 0.1600 0.04030 6.38 0.02296 0.29713 3.967 0.0256

Degrees-of-freedom method: kenward-roger

Confidence level used: 0.95

Conf-level adjustment: tukey method for comparing a family of 4 estimates

P value adjustment: tukey method for comparing a family of 4 estimates

**Figure 3H: Proportion of DAM protein markers in iMGL**

**TREM2**

We fitted a linear mixed model to predict g_mfi with genotype and experiment. The model included pair as random effect. The model's explanatory power related to the fixed effects alone (marginal R2) is 0.85. The model's intercept is at 22.05 (95% CI [11.27, 32.83]).

Within this model:

- The effect of genotype [KO] is statistically significant and positive (beta = 32.31, 95% CI [24.65, 39.96], t(19) = 8.8, p < .001, Std. beta = 1.34)

emmeans:

contrast estimate SE df lower.CL upper.CL t.ratio p.value

WT - KO -32.3 3.71 19.2 -40.1 -24.5 -8.698 <.0001

Results are averaged over the levels of: experiment

Degrees-of-freedom method: kenward-roger

Confidence level used: 0.95

**CD63:**

We fitted a linear mixed model to predict g_mfi with genotype and experiment. The model included pair as random effect. The model's total explanatory power is substantial (conditional R2 = 0.91) and the part related to the fixed effects alone (marginal R2) is of 0.90. The model's intercept is at 15.60 (95% CI [5.83, 25.37]).

Within this model:

- The effect of genotype [KO] is statistically significant and positive (beta = 15.02, 95% CI [8.45, 21.59], t(19) = 4.78, p < .001, Std. beta = 0.56)

emmeans:

contrast estimate SE df lower.CL upper.CL t.ratio p.value

WT - KO -15 3.19 19 -21.7 -8.35 -4.712 0.0002

Results are averaged over the levels of: experiment

Degrees-of-freedom method: kenward-roger

Confidence level used: 0.95

**CD11C:**

We fitted a linear mixed model to predict g_mfi with genotype and experiment. The model included pair as random effect. The model's total explanatory power is substantial (conditional R2 = 0.97) and the part related to the fixed effects alone (marginal R2) is of 0.96. The model's intercept is at 21.57 (95% CI [13.84, 29.30]).

Within this model:

- The effect of genotype [KO] is statistically significant and positive (beta = 10.31, 95% CI [4.33, 16.28], t(6) = 4.22, p = 0.006, Std. beta = 0.40)

emmeans:

contrast estimate SE df lower.CL upper.CL t.ratio p.value

WT - KO -10.3 2.44 6 -16.3 -4.33 -4.223 0.0055

Results are averaged over the levels of: experiment

Degrees-of-freedom method: kenward-roger

Confidence level used: 0.95

**Supplementary Figure 3: MEF2C loss enhances disease-associated microglia and border-associated macrophage surface marker expression**

**Supplementary Figure 3C:**

**CSF1R:**

We fitted a linear mixed model to predict g_mfi with genotype, day and diff. The model included clone as random effect. The model's total explanatory power is substantial

(conditional R2 = 0.98) and the part related to the fixed effects alone (marginal R2) is of 0.65. The model's intercept is at -5744.27 (95% CI [-16366.42, 4877.87]). Within this

model:

- The effect of genotype [KO] is statistically significant and positive (beta = 12724.55, 95% CI [549.47, 24899.63], t(14) = 2.24, p = 0.042, Std. beta = 1.07)

Emmeans:

contrast estimate SE df lower.CL upper.CL t.ratio p.value

WT - KO -12725 5680 5.01 -27305 1856 -2.241 0.0749

Results are averaged over the levels of: day, diff

Degrees-of-freedom method: kenward-roger

Confidence level used: 0.95

**TMEM119**:

We fitted a linear mixed model to predict g_mfi with genotype, day and diff. The model included clone as random effect. The model's explanatory power related to the fixed effects

alone (marginal R2) is 0.97. The model's intercept is at 186.58 (95% CI [-1140.94, 1514.10]). Within this model:

- The effect of genotype [KO] is statistically non-significant and positive (beta = 315.85, 95% CI [-750.44, 1382.14], t(14) = 0.64, p = 0.535, Std. beta = 0.04)

Emmeans:

contrast estimate SE df lower.CL upper.CL t.ratio p.value

WT - KO -316 541 3.59 -1889 1257 -0.584 0.5942

Results are averaged over the levels of: day, diff

Degrees-of-freedom method: kenward-roger

Confidence level used: 0.95

**CD45**

We fitted a linear mixed model to predict g_mfi with genotype, day and diff. The model included clone as random effect. The model's total explanatory power is substantial

(conditional R2 = 0.99) and the part related to the fixed effects alone (marginal R2) is of 0.91. The model's intercept is at 1446.36 (95% CI [-11489.33, 14382.04]). Within this

model:

- The effect of genotype [KO] is statistically non-significant and positive (beta = 7411.28, 95% CI [-7173.32, 21995.89], t(14) = 1.09, p = 0.294, Std. beta = 0.22)

Emmeans

contrast estimate SE df lower.CL upper.CL t.ratio p.value

WT - KO -7411 6810 5.04 -24873 10050 -1.089 0.3256

Results are averaged over the levels of: day, diff

Degrees-of-freedom method: kenward-roger

Confidence level used: 0.95

**CD206**

We fitted a linear mixed model to predict g_mfi with genotype, day and diff. The model included clone as random effect. The model's total explanatory power is substantial

(conditional R2 = 0.97) and the part related to the fixed effects alone (marginal R2) is of 0.84. The model's intercept is at 258.63 (95% CI [-1590.27, 2107.52]). Within this model:

- The effect of genotype [KO] is statistically non-significant and positive (beta = 624.74, 95% CI [-1455.74, 2705.22], t(14) = 0.64, p = 0.530, Std. beta = 0.18)

Emmeans:

contrast estimate SE df lower.CL upper.CL t.ratio p.value

WT - KO -625 971 5.04 -3116 1866 -0.643 0.5482

Results are averaged over the levels of: day, diff

Degrees-of-freedom method: kenward-roger

Confidence level used: 0.95

**CD11b**

We fitted a linear mixed model to predict g_mfi with genotype, day and diff. The model included clone as random effect. The model's total explanatory power is substantial

(conditional R2 = 0.99) and the part related to the fixed effects alone (marginal R2) is of 0.90. The model's intercept is at 15910.87 (95% CI [1312.31, 30509.43]). Within this

model:

- The effect of genotype [KO] is statistically non-significant and negative (beta = -8802.74, 95% CI [-25484.39, 7878.91], t(14) = -1.13, p = 0.277, Std. beta = -0.26)

Emmeans

contrast estimate SE df lower.CL upper.CL t.ratio p.value

WT - KO 8803 7780 5.02 -11171 28777 1.132 0.3090

Results are averaged over the levels of: day, diff

Degrees-of-freedom method: kenward-roger

Confidence level used: 0.95

**HLA-DR**

We fitted a linear mixed model to predict g_mfi with genotype, day and diff. The model included clone as random effect. The model's explanatory power related to the fixed effects

alone (marginal R2) is 0.95. The model's intercept is at 12736.02 (95% CI [-13881.73, 39353.77]). Within this model:

- The effect of genotype [KO] is statistically non-significant and negative (beta = -1777.04, 95% CI [-23156.93, 19602.85], t(14) = -0.18, p = 0.861, Std. beta = -0.02)

Emmeans:

contrast estimate SE df lower.CL upper.CL t.ratio p.value

WT - KO 1777 10900 3.59 -29767 33321 0.164 0.8787

Results are averaged over the levels of: day, diff

Degrees-of-freedom method: kenward-roger

Confidence level used: 0.95

**CD110c**

We fitted a linear mixed model to predict g_mfi with genotype, day and diff. The model included clone as random effect. The model's total explanatory power is substantial

(conditional R2 = 0.98) and the part related to the fixed effects alone (marginal R2) is of 0.97. The model's intercept is at 20282.93 (95% CI [2021.16, 38544.69]). Within this

model:

- The effect of genotype [KO] is statistically non-significant and negative (beta = -3609.85, 95% CI [-21064.72, 13845.01], t(14) = -0.44, p = 0.664, Std. beta = -0.04)

Emmeans:

contrast estimate SE df lower.CL upper.CL t.ratio p.value

WT - KO 3610 8520 4.53 -18989 26209 0.424 0.6911

Results are averaged over the levels of: day, diff

Degrees-of-freedom method: kenward-roger

Confidence level used: 0.95

**CD14**

We fitted a linear mixed model to predict g_mfi with genotype, day and diff. The model included clone as random effect. The model's total explanatory power is substantial

(conditional R2 = 0.98) and the part related to the fixed effects alone (marginal R2) is of 0.65. The model's intercept is at -9540.33 (95% CI [-26226.21, 7145.55]). Within this

model:

- The effect of genotype [KO] is statistically significant and positive (beta = 19679.66, 95% CI [583.33, 38776.00], t(14) = 2.21, p = 0.044, Std. beta = 1.04)

Emmeans:

contrast estimate SE df lower.CL upper.CL t.ratio p.value

WT - KO -19680 8910 5.02 -42547 3188 -2.210 0.0779

Results are averaged over the levels of: day, diff

Degrees-of-freedom method: kenward-roger

Confidence level used: 0.95

**CD163**

We fitted a linear mixed model to predict g_mfi with genotype, day and diff. The model included clone as random effect. The model's total explanatory power is substantial

(conditional R2 = 1.00) and the part related to the fixed effects alone (marginal R2) is of 0.47. The model's intercept is at -87058.05 (95% CI [-2.74e+05, 99548.66]). Within this

model:

- The effect of genotype [KO] is statistically non-significant and positive (beta = 1.78e+05, 95% CI [-37317.34, 3.93e+05], t(14) = 1.77, p = 0.098, Std. beta = 1.13)

Emmeans:

contrast estimate SE df lower.CL upper.CL t.ratio p.value

WT - KO -177869 1e+05 5 -435731 79994 -1.773 0.1364

Results are averaged over the levels of: day, diff

Degrees-of-freedom method: kenward-roger

Confidence level used: 0.95

**CX3CR1**

We fitted a linear mixed model to predict g_mfi with genotype, day and diff. The model included clone as random effect. The model's total explanatory power is substantial

(conditional R2 = 0.97) and the part related to the fixed effects alone (marginal R2) is of 0.96. The model's intercept is at 1043.74 (95% CI [-871.29, 2958.77]). Within this model:

- The effect of genotype [KO] is statistically non-significant and positive (beta = 1177.51, 95% CI [-729.18, 3084.21], t(14) = 1.32, p = 0.207, Std. beta = 0.15)

Emmeans:

contrast estimate SE df lower.CL upper.CL t.ratio p.value

WT - KO -1178 918 4.75 -3577 1222 -1.282 0.2589

Results are averaged over the levels of: day, diff

Degrees-of-freedom method: kenward-roger

Confidence level used: 0.95

**P2RY12**

We fitted a linear mixed model to predict g_mfi with genotype, day and diff. The model included clone as random effect. The model's total explanatory power is substantial

(conditional R2 = 0.99) and the part related to the fixed effects alone (marginal R2) is of 0.87. The model's intercept is at -2356.96 (95% CI [-7764.87, 3050.94]). Within this

model:

- The effect of genotype [KO] is statistically significant and positive (beta = 6826.93, 95% CI [664.43, 12989.43], t(14) = 2.38, p = 0.032, Std. beta = 0.61)

Emmeans:

contrast estimate SE df lower.CL upper.CL t.ratio p.value

WT - KO -6827 2870 5.02 -14205 551 -2.375 0.0633

Results are averaged over the levels of: day, diff

Degrees-of-freedom method: kenward-roger

Confidence level used: 0.95

**Supplementary Figure 3I:**

**CD11b**

We fitted a linear mixed model to predict g_mfi with genotype, day and diff. The model included clone as random effect. The model's total explanatory power is substantial

(conditional R2 = 0.99) and the part related to the fixed effects alone (marginal R2) is of 0.87. The model's intercept is at -2356.96 (95% CI [-7764.87, 3050.94]). Within this

model:

- The effect of genotype [KO] is statistically significant and positive (beta = 6826.93, 95% CI [664.43, 12989.43], t(14) = 2.38, p = 0.032, Std. beta = 0.61)

Emmeans:

contrast estimate SE df lower.CL upper.CL t.ratio p.value

WT - KO -6827 2870 5.02 -14205 551 -2.375 0.0633

Results are averaged over the levels of: day, diff

Degrees-of-freedom method: kenward-roger

Confidence level used: 0.95

**CD11c**

We fitted a linear mixed model to predict g_mfi with genotype, day and diff. The model included clone as random effect. The model's total explanatory power is substantial

(conditional R2 = 0.96) and the part related to the fixed effects alone (marginal R2) is of 0.95. The model's intercept is at 29414.85 (95% CI [10341.45, 48488.26]). Within this

model:

- The effect of genotype [KO] is statistically non-significant and negative (beta = -11933.02, 95% CI [-27990.15, 4124.10], t(23) = -1.54, p = 0.138, Std. beta = -0.16)

Emmeans:

contrast estimate SE df lower.CL upper.CL t.ratio p.value

WT - KO 11933 7930 5.18 -8228 32094 1.506 0.1905

Results are averaged over the levels of: day, diff

Degrees-of-freedom method: kenward-roger

Confidence level used: 0.95

**CD33**

We fitted a linear mixed model to predict g_mfi with genotype, day and diff. The model included clone as random effect. The model's total explanatory power is substantial

(conditional R2 = 0.92) and the part related to the fixed effects alone (marginal R2) is of 0.86. The model's intercept is at 1.82e+05 (95% CI [1.51e+05, 2.13e+05]). Within this

model:

- The effect of genotype [KO] is statistically non-significant and negative (beta = -18500.40, 95% CI [-52649.57, 15648.77], t(11) = -1.19, p = 0.258, Std. beta = -0.27)

Emmeans:

contrast estimate SE df lower.CL upper.CL t.ratio p.value

WT - KO 18500 15700 5.89 -20168 57169 1.176 0.2849

Results are averaged over the levels of: day, diff

Degrees-of-freedom method: kenward-roger

Confidence level used: 0.95

**CD45**

We fitted a linear mixed model to predict g_mfi with genotype, day and diff. The model included clone as random effect. The model's total explanatory power is substantial

(conditional R2 = 0.96) and the part related to the fixed effects alone (marginal R2) is of 0.89. The model's intercept is at 21173.85 (95% CI [-2135.67, 44483.37]). Within this

model:

- The effect of genotype [KO] is statistically non-significant and negative (beta = -1382.02, 95% CI [-27977.82, 25213.78], t(23) = -0.11, p = 0.915, Std. beta = -0.02)

Emmeans:

contrast estimate SE df lower.CL upper.CL t.ratio p.value

WT - KO 1382 12900 5.79 -30422 33186 0.107 0.9182

Results are averaged over the levels of: day, diff

Degrees-of-freedom method: kenward-roger

Confidence level used: 0.95

**CD63**

We fitted a linear mixed model to predict g_mfi with genotype, day and diff. The model included clone as random effect. The model's total explanatory power is substantial

(conditional R2 = 0.94) and the part related to the fixed effects alone (marginal R2) is of 0.86. The model's intercept is at 5721.96 (95% CI [-12676.39, 24120.31]). Within this

model:

- The effect of genotype [KO] is statistically non-significant and positive (beta = 13786.66, 95% CI [-6437.64, 34010.96], t(23) = 1.41, p = 0.172, Std. beta = 0.29)

Emmeans:

contrast estimate SE df lower.CL upper.CL t.ratio p.value

WT - KO -13787 9800 5.74 -38047 10474 -1.406 0.2115

Results are averaged over the levels of: day, diff

Degrees-of-freedom method: kenward-roger

Confidence level used: 0.95

**CD68**

We fitted a linear mixed model to predict g_mfi with genotype, day and diff. The model included clone as random effect. The model's total explanatory power is substantial

(conditional R2 = 0.89) and the part related to the fixed effects alone (marginal R2) is of 0.70. The model's intercept is at 1147.08 (95% CI [-4111.25, 6405.41]). Within this model:

- The effect of genotype [KO] is statistically non-significant and positive (beta = 4110.53, 95% CI [-1894.27, 10115.33], t(23) = 1.42, p = 0.170, Std. beta = 0.44)

Emmeans:

contrast estimate SE df lower.CL upper.CL t.ratio p.value

WT - KO -4111 2910 5.79 -11291 3070 -1.413 0.2090

Results are averaged over the levels of: day, diff

Degrees-of-freedom method: kenward-roger

Confidence level used: 0.95

**CD9**

We fitted a linear mixed model to predict g_mfi with genotype, day and diff. The model included clone as random effect. The model's total explanatory power is substantial

(conditional R2 = 0.94) and the part related to the fixed effects alone (marginal R2) is of 0.89. The model's intercept is at 73487.11 (95% CI [-90552.83, 2.38e+05]). Within this

model:

- The effect of genotype [KO] is statistically non-significant and positive (beta = 4592.66, 95% CI [-1.59e+05, 1.68e+05], t(23) = 0.06, p = 0.954, Std. beta = 0.01)

Emmeans:

contrast estimate SE df lower.CL upper.CL t.ratio p.value

WT - KO -4593 79500 5.58 -202741 193555 -0.058 0.9559

Results are averaged over the levels of: day, diff

Degrees-of-freedom method: kenward-roger

Confidence level used: 0.95

**CD84**

We fitted a linear mixed model to predict g_mfi with genotype, day and diff. The model included clone as random effect. The model's total explanatory power is substantial

(conditional R2 = 0.86) and the part related to the fixed effects alone (marginal R2) is of 0.71. The model's intercept is at -13306.75 (95% CI [-92188.64, 65575.13]). Within this

model:

- The effect of genotype [KO] is statistically non-significant and positive (beta = 62148.37, 95% CI [-20679.47, 1.45e+05], t(23) = 1.55, p = 0.134, Std. beta = 0.48)

Emmeans:

contrast estimate SE df lower.CL upper.CL t.ratio p.value

WT - KO -62148 40200 5.67 -161965 37669 -1.545 0.1761

Results are averaged over the levels of: day, diff

Degrees-of-freedom method: kenward-roger

Confidence level used: 0.95

**CX3CR1**

We fitted a linear mixed model to predict g_mfi with genotype, day and diff. The model included clone as random effect. The model's total explanatory power is substantial

(conditional R2 = 0.93) and the part related to the fixed effects alone (marginal R2) is of 0.89. The model's intercept is at 3438.03 (95% CI [-5359.58, 12235.63]). Within this

model:

- The effect of genotype [KO] is statistically non-significant and positive (beta = 1496.29, 95% CI [-6907.53, 9900.11], t(23) = 0.37, p = 0.716, Std. beta = 0.06)

Emmeans:

contrast estimate SE df lower.CL upper.CL t.ratio p.value

WT - KO -1496 4100 5.5 -11758 8765 -0.365 0.7289

Results are averaged over the levels of: day, diff

Degrees-of-freedom method: kenward-roger

Confidence level used: 0.95

**CXCR4**

We fitted a linear mixed model to predict g_mfi with genotype, day and diff. The model included clone as random effect. The model's total explanatory power is substantial

(conditional R2 = 0.97) and the part related to the fixed effects alone (marginal R2) is of 0.95. The model's intercept is at -304.93 (95% CI [-4589.42, 3979.56]). Within this model:

- The effect of genotype [KO] is statistically non-significant and positive (beta = 2402.29, 95% CI [-1705.31, 6509.90], t(23) = 1.21, p = 0.239, Std. beta = 0.14)

Emmeans:

contrast estimate SE df lower.CL upper.CL t.ratio p.value

WT - KO -2402 2000 5.51 -7415 2610 -1.199 0.2797

Results are averaged over the levels of: day, diff

Degrees-of-freedom method: kenward-roger

Confidence level used: 0.95

**HLA-DR**

We fitted a linear mixed model to predict g_mfi with genotype, day and diff. The model included clone as random effect. The model's total explanatory power is substantial

(conditional R2 = 0.91) and the part related to the fixed effects alone (marginal R2) is of 0.89. The model's intercept is at 14786.23 (95% CI [-29601.09, 59173.55]). Within this

model:

- The effect of genotype [KO] is statistically non-significant and positive (beta = 6072.73, 95% CI [-31031.45, 43176.91], t(23) = 0.34, p = 0.738, Std. beta = 0.05)

Emmeans:

contrast estimate SE df lower.CL upper.CL t.ratio p.value

WT - KO -6073 18300 5.16 -52752 40606 -0.331 0.7534

Results are averaged over the levels of: day, diff

Degrees-of-freedom method: kenward-roger

Confidence level used: 0.95

**TREM2**

We fitted a linear mixed model to predict g_mfi with genotype, day and diff. The model included clone as random effect. The model's total explanatory power is substantial

(conditional R2 = 0.91) and the part related to the fixed effects alone (marginal R2) is of 0.70. The model's intercept is at -406.84 (95% CI [-4383.47, 3569.79]). Within this model:

- The effect of genotype [KO] is statistically significant and positive (beta = 5725.34, 95% CI [1030.05, 10420.63], t(23) = 2.52, p = 0.019, Std. beta = 0.86)

Emmeans:

contrast estimate SE df lower.CL upper.CL t.ratio p.value

WT - KO -5725 2270 5.83 -11326 -124 -2.519 0.0465

Results are averaged over the levels of: day, diff

Degrees-of-freedom method: kenward-roger

Confidence level used: 0.95

**Figure 5. MEF2C loss enhances phagocytic, lysosomal, and cholesterol efflux functions in human iPSC-derived microglia (iMGLs)**

**Figure 5A: Scratch wound**

We fitted a linear model to predict AUC with genotype. The model's explanatory power is substantial (R2 = 0.72, adj. R2 = 0.67). The model's intercept is at 889.59 (95% CI [672.21, 1106.97]).

Within this model:The effect of genotype [WT] is statistically significant and positive (beta = 491.78, 95% CI [184.36, 799.20], t(6) = 3.91, p = 0.008, Std. beta = 1.59)

emmeans:

contrast estimate SE df lower.CL upper.CL t.ratio p.value

KO - WT -492 126 6 -799 -184 -3.914 0.0079

Confidence level used: 0.95

**Figure 5B: Beads uptake**

We fitted a linear mixed model to predict g_mfi with genotype and experiment. The model included pair as random effect. The model's total explanatory power is substantial (conditional R2 = 0.84) and the part related to the fixed effects alone (marginal R2) is of 0.84. The model's intercept is at 2.30e+06 (95% CI [2.04e+06, 2.56e+06]).

Within this model:

- The effect of genotype [KO] is statistically non-significant and negative (beta = -1.01e+05, 95% CI [-2.91e+05, 88432.11], t(17) = -1.13, p = 0.276, Std. beta

= -0.18)

emmeans:

contrast estimate SE df lower.CL upper.CL t.ratio p.value

WT - KO 101074 91900 17.2 -92695 294842 1.100 0.2867

Results are averaged over the levels of: experiment

Degrees-of-freedom method: kenward-roger

Confidence level used: 0.95

**Figure 5C: Zymosan uptake**

We fitted a linear mixed model to predict g_mfi with genotype and experiment. The model included pair as random effect. The model's total explanatory power is substantial (conditional R2 = 0.78) and the part related to the fixed effects alone (marginal R2) is of 0.78. The model's intercept is at 3.51e+05 (95% CI [87138.04, 6.16e+05]).

Within this model:

- The effect of genotype [KO] is statistically non-significant and negative (beta = -1.75e+05, 95% CI [-3.89e+05, 40446.30], t(21) = -1.69, p = 0.106, Std. beta = -0.30)

emmeans:

contrast estimate SE df lower.CL upper.CL t.ratio p.value

WT - KO 174522 105000 21.3 -43375 392420 1.664 0.1107

Results are averaged over the levels of: experiment

Degrees-of-freedom method: kenward-roger

Confidence level used: 0.95

**Figure 5D: Myelin uptake**

We fitted a linear mixed model to predict g_mfi with genotype and experiment. The model included pair as random effect. The model's explanatory power related to the fixed effects alone (marginal R2) is 0.77. The model's intercept is at -1.15e+05 (95% CI [-5.13e+05, 2.83e+05]).

Within this model:

- The effect of genotype [KO] is statistically significant and positive (beta = 4.88e+05, 95% CI [1.19e+05, 8.56e+05], t(14) = 2.84, p = 0.013, Std. beta = 0.60)

emmeans:

contrast estimate SE df lower.CL upper.CL t.ratio p.value

WT - KO -487803 172000 14.5 -855069 -120536 -2.839 0.0128

Results are averaged over the levels of: experiment

Degrees-of-freedom method: kenward-roger

Confidence level used: 0.95

**Figure 5E: Lysosomal acidification (LysoSensor)**

We fitted a linear mixed model to predict g_mfi with genotype and experiment. The model included pair as random effect. The model's explanatory power related to the fixed effects alone (marginal R2) is 0.87. The model's intercept is at 5408.52 (95% CI [3043.03, 7774.01]).

Within this model: The effect of genotype [KO] is statistically non-significant and positive (beta = 2079.28, 95% CI [-150.92, 4309.49], t(6) = 2.28, p

= 0.063, Std. beta = 0.45)

emmeans:

contrast estimate SE df lower.CL upper.CL t.ratio p.value

WT - KO -2079 911 6 -4309 151 -2.281 0.0627

Results are averaged over the levels of: experiment

Degrees-of-freedom method: kenward-roger

Confidence level used: 0.95

**Figure 5F: Lysosomal proteolysis (DQ-BSA)**

We fitted a linear mixed model to predict g_mfi with genotype and experiment. The model included pair as random effect. The model's explanatory power related to the fixed effects alone (marginal R2) is 0.69. The model's intercept is at -3283.87 (95% CI [-10850.23, 4282.50]).

Within this model:The effect of genotype [KO] is statistically significant and positive (beta = 13579.15, 95% CI [6906.24, 20252.05], t(16) = 4.31, p < .001, Std. beta = 1.01)

emmeans:

contrast estimate SE df lower.CL upper.CL t.ratio p.value

WT - KO -13579 3160 15.7 -20290 -6868 -4.297 0.0006

Results are averaged over the levels of: experiment

Degrees-of-freedom method: kenward-roger

Confidence level used: 0.95

**Figure 5G: Lysosomal markers**

**LAMP1**

We fitted a linear mixed model to predict intensity with genotype, diff and actin_scaled. The model included clone as random effect. The model's explanatory power related to the fixed effects alone (marginal R2) is 0.93. The model's intercept is at 4037.34 (95% CI [1262.86, 6811.82]).

Within this model:

- The effect of genotype [KO] is statistically significant and positive (beta = 4709.28, 95% CI [2205.69, 7212.86], t(6) = 4.60, p = 0.004, Std. beta = 0.74)

emmeans

contrast estimate SE df lower.CL upper.CL t.ratio p.value

WT - KO -4709 1130 4.08 -7830 -1588 -4.156 0.0136

Results are averaged over the levels of: diff

Degrees-of-freedom method: kenward-roger

Confidence level used: 0.95

**Cathepsin B**

We fitted a linear mixed model to predict intensity with genotype, diff and actin_scaled. The model included clone as random effect. The model's explanatory power related to the fixed effects alone (marginal R2) is 0.63. The model's intercept is at 3490.93 (95% CI [888.01, 6093.84]).

Within this model:

- The effect of genotype [KO] is statistically significant and positive (beta = 4190.68, 95% CI [1807.86, 6573.49], t(6) = 4.30, p = 0.005, Std. beta = 1.67)

emmeans

contrast estimate SE df lower.CL upper.CL t.ratio p.value

WT - KO -4191 1070 4.34 -7084 -1297 -3.899 0.0150

Results are averaged over the levels of: diff

Degrees-of-freedom method: kenward-roger

Confidence level used: 0.95

**Galectin 3**

We fitted a linear mixed model to predict intensity with genotype, diff and actin_scaled. The model included clone as random effect. The model's explanatory power related to the fixed effects alone (marginal R2) is 0.77. The model's intercept is at 129.48 (95% CI [-1526.23, 1785.18]).

Within this model:

- The effect of genotype [KO] is statistically significant and positive (beta = 2494.62, 95% CI [1000.58, 3988.67], t(6) = 4.09, p = 0.006, Std. beta = 1.19)

**emmeans**

contrast estimate SE df lower.CL upper.CL t.ratio p.value

WT - KO -2495 676 4.08 -4357 -632 -3.689 0.0203

Results are averaged over the levels of: diff

Degrees-of-freedom method: kenward-roger

Confidence level used: 0.95

**Osteoactivin**

We fitted a linear mixed model to predict intensity with genotype, diff and actin_scaled. The model included clone as random effect. The model's explanatory power related to the fixed effects alone (marginal R2) is 0.28. The model's intercept is at 8658.01 (95% CI [2959.38, 14356.64]).

Within this model:

- The effect of genotype [KO] is statistically non-significant and positive (beta = 3179.09, 95% CI [-1963.13, 8321.31], t(6) = 1.51, p = 0.181, Std. beta = 0.86)

**emmeans**

contrast estimate SE df lower.CL upper.CL t.ratio p.value

WT - KO -3179 2330 4.08 -9589 3231 -1.366 0.2424

Results are averaged over the levels of: diff

Degrees-of-freedom method: kenward-roger

Confidence level used: 0.95

**Figure 5H: Cholesterol acceptor and transporter**

**APOE**

We fitted a linear mixed model to predict intensity with genotype, diff and actin_scaled. The model included clone as random effect. The model's explanatory power related to the fixed effects alone (marginal R2) is 0.77. The model's intercept is at 1263.14 (95% CI [-2360.19, 4886.48]).

Within this model:

- The effect of genotype [KO] is statistically significant and positive (beta = 4025.08, 95% CI [785.71, 7264.46], t(10) = 2.77, p = 0.020, Std. beta = 0.69)

emmeans:

contrast estimate SE df lower.CL upper.CL t.ratio p.value

WT - KO -4025 1470 5.34 -7722 -328 -2.746 0.0378

Results are averaged over the levels of: diff

Degrees-of-freedom method: kenward-roger

Confidence level used: 0.95

**ABCA1**

We fitted a linear mixed model to predict intensity with genotype, diff and actin_scaled. The model included clone as random effect. The model's explanatory power related to the fixed effects alone (marginal R2) is 0.32. The model's intercept is at 1726.94 (95% CI [-977.15, 4431.02]).

Within this model:

- The effect of genotype [KO] is statistically significant and positive (beta = 2542.27, 95% CI [95.84, 4988.70], t(10) = 2.32, p = 0.043, Std. beta = 1.07)

emmeans

contrast estimate SE df lower.CL upper.CL t.ratio p.value

WT - KO -2542 1110 5.95 -5268 183 -2.287 0.0626

Results are averaged over the levels of: diff

Degrees-of-freedom method: kenward-roger

Confidence level used: 0.95

**Figure 5I: Secreted APOE**

We fitted a linear mixed model to predict absorbance with genotype and experiment. The model included clone as random effect. The

model's explanatory power related to the fixed effects alone (marginal R2) is 0.84. The model's intercept is at 133.89 (95% CI [-89.98, 357.76]).

Within this model:The effect of genotype [KO] is statistically significant and positive (beta = 1263.46, 95% CI [989.28, 1537.65], t(15) = 9.82, p <.001, Std. beta = 1.80)

emmeans:

contrast estimate SE df lower.CL upper.CL t.ratio p.value

WT - KO -1263 134 3.22 -1673 -854 -9.459 0.0019

Results are averaged over the levels of: experiment

Degrees-of-freedom method: kenward-roger

Confidence level used: 0.95

**Figure 5J: Cholesterol efflux**

We fitted a linear mixed model to predict fluorescence_s with genotype, total_fluorescence and replicate. The model included clone as random effect. The model's total explanatory power is substantial (conditional R2 = 0.98) and the part related to the fixed effects alone (marginal R2) is of 0.96. The model's intercept is at 0.16 (95% CI [-0.38, 0.70]).

Within this model: The effect of genotype [KO] is statistically significant and positive (beta = 0.74, 95% CI [0.25, 1.23], t(44) = 3.05, p = 0.004, Std. beta = 0.31)

emmeans:

contrast estimate SE df lower.CL upper.CL t.ratio p.value

WT - KO -0.738 0.242 5.34 -1.35 -0.127 -3.047 0.0262

Results are averaged over the levels of: replicate

Degrees-of-freedom method: kenward-roger

Confidence level used: 0.95

**Figure 5K: BODIPY**

We fitted a linear mixed model to predict g_mfi with genotype and experiment. The model included pair as random effect. The model's total explanatory power is substantial (conditional R2 = 0.76) and the part related to the fixed effects alone (marginal R2) is of 0.36. The model's intercept is at 3241.22 (95% CI [-1176.05, 7658.48]). Within this model:The effect of genotype [KO] is statistically significant and positive (beta = 2426.65, 95% CI [784.99, 4068.30], t(16) = 3.13, p =

0.006, Std. beta = 0.76)

emmeans:

contrast estimate SE df lower.CL upper.CL t.ratio p.value

WT - KO -2427 783 15.4 -4091 -763 -3.101 0.0071

Results are averaged over the levels of: experiment

Degrees-of-freedom method: kenward-roger

Confidence level used: 0.95

**Figure 6: MEF2C knockdown in THP-1 macrophages and Mef2c knockout in mouse microglia recapitulate DLAM transcriptional and functional programs**

**Figure 6A: Model of THP-1 macrophages with reduced level of MEF2C**

**qPCR**

We fitted a linear mixed model to predict log2FC with Genotype. The model included Batch as random effect. The model's total explanatory power is substantial (conditional R2 = 0.83) and the part related to the fixed effects alone (marginal R2) is of 0.70. The model's intercept is at -1.87 (95% CI [-2.36, -1.39]).

Within this model:

- The effect of Genotype [SCR] is statistically significant and positive (beta = 1.90, 95% CI [1.52, 2.29], t(22) = 10.24, p < .001, Std. beta = 1.65)

emmeans

contrast estimate SE df lower.CL upper.CL t.ratio p.value

KD - SCR -1.9 0.186 20 -2.29 -1.51 -10.242 <.0001

Degrees-of-freedom method: kenward-roger

Confidence level used: 0.95

**Western blot**

We fitted a linear mixed model to predict intensity with genotype and actin_scaled. The model included batch as random effect. The model's total explanatory power is substantial (conditional R2 = 0.86) and the part related to the fixed effects alone (marginal R2) is of 0.72. The model's intercept is at 20873.22 (95% CI [15816.30, 25930.14]). Within this model:

- The effect of genotype [KD] is statistically significant and negative (beta = -15901.12, 95% CI [-20025.11, -11777.13], t(11) = -8.49, p < .001, Std. beta =

-1.67)

emmeans

contrast estimate SE df lower.CL upper.CL t.ratio p.value

SCR - KD 15901 1880 10.1 11721 20081 8.466 <.0001

Degrees-of-freedom method: kenward-roger

Confidence level used: 0.95

**Figure 6E: qPCR analysis of DLAM core genes in THP-1 macrophages with reduced level of MEF2C**

**CCL2**

We fitted a linear mixed model to predict log2FC with Genotype. The model included Well as random effects. The model's explanatory power related to the fixed

effects alone (marginal R2) is 0.76. The model's intercept is at 1.38 (95% CI [0.19, 2.56]). Within this model:

- The effect of Genotype [SCR] is statistically significant and negative (beta = -1.38, 95% CI [-1.82, -0.93], t(11) = -6.87, p < .001, Std. beta = -1.11)

Emmeans

contrast estimate SE df lower.CL upper.CL t.ratio p.value

KD - SCR 1.38 0.2 7 0.902 1.85 6.871 0.0002

Degrees-of-freedom method: kenward-roger

Confidence level used: 0.95

**CXCR4**

We fitted a linear mixed model to predict log2FC with Genotype. The model included Well as random effects. The model's total explanatory power is substantial

(conditional R2 = 0.96) and the part related to the fixed effects alone (marginal R2) is of 0.17. The model's intercept is at 0.81 (95% CI [-0.19, 1.81]).

Within this model:

- The effect of Genotype [SCR] is statistically significant and negative (beta = -0.81, 95% CI [-1.03, -0.59], t(11) = -7.98, p < .001, Std. beta = -0.87)

Emmeans

contrast estimate SE df lower.CL upper.CL t.ratio p.value

KD - SCR 0.809 0.101 7 0.569 1.05 7.980 0.0001

Degrees-of-freedom method: kenward-roger

Confidence level used: 0.95

**APOC1**

We fitted a linear mixed model to predict log2FC with Genotype. The model included Well as random effects. The model's total explanatory power is substantial

(conditional R2 = 0.94) and the part related to the fixed effects alone (marginal R2) is of 0.09. The model's intercept is at 0.60 (95% CI [-0.48, 1.69]).

Within this model:

- The effect of Genotype [SCR] is statistically significant and negative (beta = -0.60, 95% CI [-0.89, -0.31], t(11) = -4.55, p < .001, Std. beta = -0.62)

Emmeans

contrast estimate SE df lower.CL upper.CL t.ratio p.value

KD - SCR 0.601 0.132 7 0.289 0.913 4.553 0.0026

Degrees-of-freedom method: kenward-roger

Confidence level used: 0.95

**BHLHE41**

We fitted a linear mixed model to predict log2FC with Genotype. The model included Well as random effects. The model's total explanatory power is substantial

(conditional R2 = 0.99) and the part related to the fixed effects alone (marginal R2) is of 4.68e-03. The model's intercept is at 0.46 (95% CI [-3.32, 4.23]).

Within this model:

- The effect of Genotype [SCR] is statistically significant and negative (beta = -0.46, 95% CI [-0.77, -0.14], t(11) = -3.18, p = 0.009, Std. beta = -0.15)

Emmeans

contrast estimate SE df lower.CL upper.CL t.ratio p.value

KD - SCR 0.456 0.143 7 0.117 0.795 3.184 0.0154

Degrees-of-freedom method: kenward-roger

Confidence level used: 0.95

**NR1H3**

We fitted a linear mixed model to predict log2FC with Genotype. The model included Well as random effects. The model's explanatory power related to the fixed

effects alone (marginal R2) is 0.68. The model's intercept is at 0.71 (95% CI [-0.10, 1.52]). Within this model:

- The effect of Genotype [SCR] is statistically significant and negative (beta = -0.71, 95% CI [-0.98, -0.43], t(11) = -5.63, p < .001, Std. beta = -0.91)

Emmeans

contrast estimate SE df lower.CL upper.CL t.ratio p.value

KD - SCR 0.707 0.125 7 0.41 1 5.635 0.0008

Degrees-of-freedom method: kenward-roger

Confidence level used: 0.95

**CTSB**

We fitted a linear mixed model to predict log2FC with Genotype. The model included Well as random effects. The model's explanatory power related to the fixed

effects alone (marginal R2) is 0.46. The model's intercept is at 0.64 (95% CI [-1.22, 2.50]). Within this model:

- The effect of Genotype [SCR] is statistically significant and negative (beta = -0.64, 95% CI [-1.04, -0.25], t(11) = -3.61, p = 0.004, Std. beta = -0.41)

Emmeans

contrast estimate SE df lower.CL upper.CL t.ratio p.value

KD - SCR 0.644 0.178 7 0.222 1.07 3.610 0.0086

Degrees-of-freedom method: kenward-roger

Confidence level used: 0.95

**APOE**

We fitted a linear mixed model to predict log2FC with Genotype. The model included Well as random effects. The model's explanatory power related to the fixed

effects alone (marginal R2) is 0.39. The model's intercept is at 0.59 (95% CI [-0.71, 1.88]). Within this model:

- The effect of Genotype [SCR] is statistically significant and negative (beta = -0.59, 95% CI [-1.01, -0.17], t(11) = -3.09, p = 0.010, Std. beta = -0.52)

emmeans

contrast estimate SE df lower.CL upper.CL t.ratio p.value

KD - SCR 0.588 0.19 7 0.137 1.04 3.086 0.0177

Degrees-of-freedom method: kenward-roger

Confidence level used: 0.95

**ABCA1**

We fitted a linear mixed model to predict log2FC with Genotype. The model included Well as random effects. The model's explanatory power related to the fixed

effects alone (marginal R2) is 0.42. The model's intercept is at 0.60 (95% CI [-0.83, 2.04]). Within this model:

- The effect of Genotype [SCR] is statistically significant and negative (beta = -0.60, 95% CI [-1.00, -0.20], t(11) = -3.31, p = 0.007, Std. beta = -0.49)

emmeans

contrast estimate SE df lower.CL upper.CL t.ratio p.value

KD - SCR 0.603 0.182 7 0.173 1.03 3.314 0.0129

Degrees-of-freedom method: kenward-roger

Confidence level used: 0.95

**CD11c**

We fitted a linear mixed model to predict log2FC with Genotype. The model included Well as random effects. The model's explanatory power related to the fixed

effects alone (marginal R2) is 0.75. The model's intercept is at 0.57 (95% CI [-0.12, 1.26]). Within this model:

- The effect of Genotype [SCR] is statistically significant and negative (beta = -0.57, 95% CI [-0.76, -0.38], t(11) = -6.63, p < .001, Std. beta = -0.89)

emmeans

contrast estimate SE df lower.CL upper.CL t.ratio p.value

KD - SCR 0.573 0.0864 7 0.369 0.778 6.634 0.0003

Degrees-of-freedom method: kenward-roger

Confidence level used: 0.95

**CTSZ**

We fitted a linear mixed model to predict log2FC with Genotype. The model included Well as random effects. The model's explanatory power related to the fixed

effects alone (marginal R2) is 0.51. The model's intercept is at 0.46 (95% CI [-0.99, 1.91]). Within this model:

- The effect of Genotype [SCR] is statistically significant and negative (beta = -0.46, 95% CI [-0.72, -0.21], t(11) = -3.95, p = 0.002, Std. beta = -0.38)

emmeans

contrast estimate SE df lower.CL upper.CL t.ratio p.value

KD - SCR 0.464 0.117 7 0.187 0.742 3.955 0.0055

Degrees-of-freedom method: kenward-roger

Confidence level used: 0.95

**GPNMB**

We fitted a linear mixed model to predict log2FC with Genotype. The model included Well as random effects. The model's total explanatory power is substantial

(conditional R2 = 0.94) and the part related to the fixed effects alone (marginal R2) is of 0.05. The model's intercept is at 0.31 (95% CI [-0.38, 0.99]).

Within this model:

- The effect of Genotype [SCR] is statistically significant and negative (beta = -0.31, 95% CI [-0.50, -0.11], t(11) = -3.49, p = 0.005, Std. beta = -0.46)

emmeans

contrast estimate SE df lower.CL upper.CL t.ratio p.value

KD - SCR 0.305 0.0875 7 0.0982 0.512 3.486 0.0102

Degrees-of-freedom method: kenward-roger

Confidence level used: 0.95

**CD63**

We fitted a linear mixed model to predict log2FC with Genotype. The model included Well as random effects. The model's explanatory power related to the fixed

effects alone (marginal R2) is 0.14. The model's intercept is at 0.14 (95% CI [-0.67, 0.96]). Within this model:

- The effect of Genotype [SCR] is statistically non-significant and negative (beta = -0.14, 95% CI [-0.34, 0.06], t(11) = -1.55, p = 0.149, Std. beta = -0.21)

emmeans

contrast estimate SE df lower.CL upper.CL t.ratio p.value

KD - SCR 0.142 0.0917 7 -0.0747 0.359 1.550 0.1651

Degrees-of-freedom method: kenward-roger

Confidence level used: 0.95

**LGALS3**

We fitted a linear mixed model to predict log2FC with Genotype. The model included Well as random effects. The model's total explanatory power is substantial

(conditional R2 = 0.98) and the part related to the fixed effects alone (marginal R2) is of 9.60e-04. The model's intercept is at 0.06 (95% CI [-1.09, 1.21]).

Within this model:

- The effect of Genotype [SCR] is statistically non-significant and negative (beta = -0.06, 95% CI [-0.23, 0.11], t(11) = -0.82, p = 0.432, Std. beta = -0.07)

emmeans

contrast estimate SE df lower.CL upper.CL t.ratio p.value

KD - SCR 0.0631 0.0774 7 -0.12 0.246 0.816 0.4413

Degrees-of-freedom method: kenward-roger

Confidence level used: 0.95

**PLIN2**

We fitted a linear mixed model to predict log2FC with Genotype. The model included Well as random effects. The model's explanatory power related to the fixed

effects alone (marginal R2) is 0.17. The model's intercept is at 0.25 (95% CI [-1.01, 1.52]). Within this model:

- The effect of Genotype [SCR] is statistically non-significant and negative (beta = -0.25, 95% CI [-0.58, 0.07], t(11) = -1.73, p = 0.111, Std. beta = -0.24)

emmeans

contrast estimate SE df lower.CL upper.CL t.ratio p.value

KD - SCR 0.254 0.147 7 -0.0925 0.601 1.734 0.1266

Degrees-of-freedom method: kenward-roger

Confidence level used: 0.95

**TREM2**

We fitted a linear mixed model to predict log2FC with Genotype. The model included Well as random effects. The model's total explanatory power is substantial

(conditional R2 = 0.96) and the part related to the fixed effects alone (marginal R2) is of 1.43e-03. The model's intercept is at 0.12 (95% CI [-1.66, 1.90]).

Within this model:

- The effect of Genotype [SCR] is statistically non-significant and negative (beta = -0.12, 95% CI [-0.47, 0.23], t(11) = -0.75, p = 0.470, Std. beta = -0.08)

emmeans

contrast estimate SE df lower.CL upper.CL t.ratio p.value

KD - SCR 0.12 0.16 7 -0.259 0.498 0.749 0.4785

Degrees-of-freedom method: kenward-roger

Confidence level used: 0.95

**LPL**

We fitted a linear mixed model to predict log2FC with Genotype. The model included Well as random effects. The model's explanatory power related to the fixed

effects alone (marginal R2) is 3.98e-03. The model's intercept is at -0.03 (95% CI [-0.55, 0.48]). Within this model:

- The effect of Genotype [SCR] is statistically non-significant and positive (beta = 0.03, 95% CI [-0.27, 0.34], t(11) = 0.24, p = 0.811, Std. beta = 0.07)

emmeans

contrast estimate SE df lower.CL upper.CL t.ratio p.value

KD - SCR -0.034 0.139 7 -0.362 0.294 -0.245 0.8136

Degrees-of-freedom method: kenward-roger

Confidence level used: 0.95

**FABP5**

We fitted a linear mixed model to predict log2FC with Genotype. The model included Well as random effects. The model's total explanatory power is substantial

(conditional R2 = 0.94) and the part related to the fixed effects alone (marginal R2) is of 1.48e-05. The model's intercept is at 0.01 (95% CI [-1.52, 1.54]).

Within this model:

- The effect of Genotype [SCR] is statistically non-significant and negative (beta = -0.01, 95% CI [-0.40, 0.38], t(11) = -0.06, p = 0.954, Std. beta =

-8.28e-03)

emmeans

contrast estimate SE df lower.CL upper.CL t.ratio p.value

KD - SCR 0.0106 0.178 7 -0.411 0.432 0.060 0.9542

Degrees-of-freedom method: kenward-roger

Confidence level used: 0.95

**LIPA**

We fitted a linear mixed model to predict log2FC with Genotype. The model included Well as random effects. The model's explanatory power related to the fixed

effects alone (marginal R2) is 0.13. The model's intercept is at 0.61 (95% CI [-0.47, 1.68]). Within this model:

- The effect of Genotype [SCR] is statistically non-significant and negative (beta = -0.61, 95% CI [-1.50, 0.29], t(11) = -1.48, p = 0.167, Std. beta = -0.55)

emmeans

contrast estimate SE df lower.CL upper.CL t.ratio p.value

KD - SCR 0.605 0.409 7 -0.361 1.57 1.481 0.1821

Degrees-of-freedom method: kenward-roger

Confidence level used: 0.95

**CD9**

We fitted a linear mixed model to predict log2FC with Genotype. The model included Well as random effects. The model's explanatory power related to the fixed

effects alone (marginal R2) is 4.66e-04. The model's intercept is at 0.02 (95% CI [-1.00, 1.04]). Within this model:

- The effect of Genotype [SCR] is statistically non-significant and negative (beta = -0.02, 95% CI [-0.58, 0.54], t(11) = -0.08, p = 0.935, Std. beta = -0.02)

emmeans

contrast estimate SE df lower.CL upper.CL t.ratio p.value

KD - SCR 0.0212 0.254 7 -0.58 0.622 0.084 0.9357

Degrees-of-freedom method: kenward-roger

Confidence level used: 0.95

**SPP1**

We fitted a linear mixed model to predict log2FC with Genotype. The model included Well as random effects. The model's explanatory power related to the fixed

effects alone (marginal R2) is 0.54. The model's intercept is at -0.52 (95% CI [-1.10, 0.07]). Within this model:

- The effect of Genotype [SCR] is statistically significant and positive (beta = 0.52, 95% CI [0.25, 0.78], t(11) = 4.23, p = 0.001, Std. beta = 0.90)

emmeans

contrast estimate SE df lower.CL upper.CL t.ratio p.value

KD - SCR -0.515 0.122 7 -0.803 -0.227 -4.231 0.0039

Degrees-of-freedom method: kenward-roger

Confidence level used: 0.95

**P2RY12**

We fitted a linear mixed model to predict log2FC with Genotype. The model included Well as random effects. The model's total explanatory power is substantial

(conditional R2 = 0.93) and the part related to the fixed effects alone (marginal R2) is of 0.06. The model's intercept is at -0.70 (95% CI [-2.30, 0.89]).

Within this model:

- The effect of Genotype [SCR] is statistically significant and positive (beta = 0.70, 95% CI [0.27, 1.14], t(11) = 3.55, p = 0.005, Std. beta = 0.51)

emmeans

contrast estimate SE df lower.CL upper.CL t.ratio p.value

KD - SCR -0.703 0.198 7 -1.17 -0.235 -3.551 0.0093

Degrees-of-freedom method: kenward-roger

Confidence level used: 0.95

**CX3CR1**

We fitted a linear mixed model to predict log2FC with Genotype. The model included Well as random effects. The model's total explanatory power is substantial

(conditional R2 = 0.97) and the part related to the fixed effects alone (marginal R2) is of 0.08. The model's intercept is at -0.84 (95% CI [-2.39, 0.71]).

Within this model:

- The effect of Genotype [SCR] is statistically significant and positive (beta = 0.84, 95% CI [0.54, 1.13], t(11) = 6.29, p < .001, Std. beta = 0.62)

emmeans

contrast estimate SE df lower.CL upper.CL t.ratio p.value

KD - SCR -0.837 0.133 7 -1.15 -0.523 -6.295 0.0004

Degrees-of-freedom method: kenward-roger

Confidence level used: 0.95

**MEF2C**

We fitted a linear mixed model to predict log2FC with Genotype. The model included Well as random effects. The model's explanatory power related to the fixed

effects alone (marginal R2) is 0.96. The model's intercept is at -2.17 (95% CI [-3.67, -0.67]). Within this model:

- The effect of Genotype [SCR] is statistically significant and positive (beta = 2.17, 95% CI [1.91, 2.43], t(11) = 18.35, p < .001, Std. beta = 1.30)

emmeans

contrast estimate SE df lower.CL upper.CL t.ratio p.value

KD - SCR -2.17 0.118 7 -2.45 -1.89 -18.353 <.0001

Degrees-of-freedom method: kenward-roger

Confidence level used: 0.95

**Figure 6F: Functional responses in MEF2C-KD THP-1 macrophages**

**Myelin uptake:**

We fitted a linear mixed model to predict index with genotype. The model included batch as random effect. The model's total explanatory power is substantial (conditional R2 = 0.95) and the part related to the fixed effects alone (marginal R2) is of 0.04. The model's intercept is at 6.21e+06 (95% CI [4.61e+06, 7.80e+06]).

Within this model:

- The effect of genotype [KD] is statistically significant and positive (beta = 8.47e+05, 95% CI [5.77e+05, 1.12e+06], t(44) = 6.32, p < .001, Std. beta = 0.47)

emmeans

contrast estimate SE df lower.CL upper.CL t.ratio p.value

SCR - KD -847135 134000 41 -1117925 -576346 -6.318 <.0001

Degrees-of-freedom method: kenward-roger

Confidence level used: 0.95

**Figure 6G: Functional responses in MEF2C-KD THP-1 macrophages**

**secreted APOE:**

We fitted a linear mixed model to predict apoe with genotype. The model included batch as random effect. The model's total explanatory power is substantial (conditional R2 = 0.44) and the part related to the fixed effects alone (marginal R2) is of 0.38. The model's intercept is at 10.85 (95% CI [7.25, 14.45]).

Within this model:

- The effect of genotype [KD] is statistically significant and positive (beta = 8.18, 95% CI [3.64, 12.73], t(18) = 3.78, p = 0.001, Std. beta = 1.26)

emmeans

contrast estimate SE df lower.CL upper.CL t.ratio p.value

SCR - KD -8.18 2.19 18.4 -12.8 -3.59 -3.732 0.0015

Degrees-of-freedom method: kenward-roger

Confidence level used: 0.95

**BODIPY+ neutral lipid droplets:**

We fitted a linear mixed model to predict g_mfi with genotype. The model included batch as random effect. The model's total explanatory power is substantial (conditional R2 = 0.80) and the part related to the fixed effects alone (marginal R2) is of 0.28. The model's intercept is at 8319.56 (95% CI [5096.23, 11542.90]).

Within this model:

- The effect of genotype [KD] is statistically significant and positive (beta = 4833.83, 95% CI [3437.78, 6229.88], t(32) = 7.05, p < .001, Std. beta = 1.11)

emmeans:

contrast estimate SE df lower.CL upper.CL t.ratio p.value

SCR - KD -4834 685 30 -6234 -3434 -7.053 <.0001

Degrees-of-freedom method: kenward-roger

Confidence level used: 0.95

**Cholesterol efflux:**

We fitted a linear mixed model to predict fluorescence_s with genotype. The model included batch as random effect. The model's total explanatory power is substantial (conditional R2 = 0.54) and the part related to the fixed effects alone (marginal R2) is of 0.12. The model's intercept is at 4.43 (95% CI [2.81,

6.05]). Within this model:

- The effect of genotype [KD] is statistically significant and positive (beta = 1.50, 95% CI [0.44, 2.57], t(28) = 2.89, p = 0.007, Std. beta = 0.75)

emmeans

contrast estimate SE df lower.CL upper.CL t.ratio p.value

SCR - KD -1.5 0.522 27 -2.58 -0.435 -2.886 0.0076

Degrees-of-freedom method: kenward-roger

Confidence level used: 0.95

**Figure 7: MEF2C coordinates a transcriptional and chromatin regulatory program underlying disease-associated microglial states**

**Figure 7E: Functional responses controlled by LXR in MEF2C-KO iMGLs**

**BODIPY+ neutral lipid droplets:**

We fitted a linear mixed model to predict g_mfi_mean with genotype and treatment. The model included clone as random effect. The model's total explanatory power is substantial (conditional R2 = 0.98) and the part related to the fixed effects alone (marginal R2) is of 0.37. The model's intercept is at 5998.64 (95% CI [2498.91, 9498.37]).

Within this model:

- The effect of genotype [KO] is statistically non-significant and positive (beta = 3788.40, 95% CI [-1557.53, 9134.33], t(8) = 1.63, p = 0.141, Std. beta = 1.07)

- The effect of treatment [Veh] is statistically non-significant and positive (beta = 774.23, 95% CI [-169.84, 1718.29], t(8) = 1.89, p = 0.095, Std. beta = 0.22)

- The effect of genotype [KO] × treatment [Veh] is statistically non-significant and positive (beta = 1100.19, 95% CI [-341.90, 2542.27], t(8) = 1.76, p = 0.117,

Std. beta = 0.31)

emmeans:

contrast estimate SE df lower.CL upper.CL t.ratio p.value

WT Ant - KO Ant -3788 2320 5.19 -12225 4649 -1.634 0.4371

WT Ant - WT Veh -774 409 5.00 -2285 736 -1.891 0.3373

WT Ant - KO Veh -5663 2320 5.19 -14100 2774 -2.443 0.1820

KO Ant - WT Veh 3014 2320 5.19 -5423 11451 1.300 0.5992

KO Ant - KO Veh -1874 473 5.00 -3619 -130 -3.965 0.0383

WT Veh - KO Veh -4889 2320 5.19 -13326 3548 -2.109 0.2638

Degrees-of-freedom method: kenward-roger

Confidence level used: 0.95

Conf-level adjustment: tukey method for comparing a family of 4 estimates

P value adjustment: tukey method for comparing a family of 4 estimates

**DQ-BSA**

We fitted a linear mixed model to predict g_mfi_mean with genotype and treatment. The model included clone as random effect. The model's total explanatory power is substantial (conditional R2 = 0.96) and the part related to the fixed effects alone (marginal R2) is of 0.76. The model's intercept is at 15069.66 (95% CI [7474.36, 22664.96]).

Within this model:

- The effect of genotype [KO] is statistically significant and positive (beta = 24131.66, 95% CI [12529.64, 35733.68], t(8) = 4.80, p = 0.001, Std. beta = 1.85)

- The effect of treatment [Veh] is statistically non-significant and positive (beta = 1361.00, 95% CI [-3096.36, 5818.35], t(8) = 0.70, p = 0.501, Std. beta = 0.10)

- The effect of genotype [KO] × treatment [Veh] is statistically non-significant and negative (beta = -2960.74, 95% CI [-9769.46, 3847.97], t(8) = -1.00, p = 0.345, Std. beta = -0.23)

**emmeans:**

contrast estimate SE df lower.CL upper.CL t.ratio p.value

WT Ant - KO Ant -24132 5030 5.93 -41610 -6654 -4.796 0.0122

WT Ant - WT Veh -1361 1930 5.00 -8493 5771 -0.704 0.8914

WT Ant - KO Veh -22532 5030 5.93 -40010 -5054 -4.478 0.0168

KO Ant - WT Veh 22771 5030 5.93 5293 40249 4.526 0.0160

KO Ant - KO Veh 1600 2230 5.00 -6636 9835 0.717 0.8865

WT Veh - KO Veh -21171 5030 5.93 -38649 -3693 -4.208 0.0223

Degrees-of-freedom method: kenward-roger

Confidence level used: 0.95

Conf-level adjustment: tukey method for comparing a family of 4 estimates

P value adjustment: tukey method for comparing a family of 4 estimates

**CD63**

We fitted a linear mixed model to predict positive_cells_mean with genotype and treatment. The model included clone as random effect. The model's total explanatory power is substantial (conditional R2 = 0.98) and the part related to the fixed effects alone (marginal R2) is of 0.55. The model's intercept is at 4.13 (95% CI [-3.55, 11.81]).

Within this model:

- The effect of genotype [KO] is statistically non-significant and positive (beta = 9.54, 95% CI [-2.20, 21.27], t(8) = 1.87, p = 0.098, Std. beta = 1.01)

- The effect of treatment [Veh] is statistically significant and positive (beta = 2.60, 95% CI [0.49, 4.71], t(8) = 2.84, p = 0.022, Std. beta = 0.28)

- The effect of genotype [KO] × treatment [Veh] is statistically significant and positive (beta = 6.74, 95% CI [3.52, 9.97], t(8) = 4.82, p = 0.001, Std. beta =

0.71)

emmeans:

contrast estimate SE df lower.CL upper.CL t.ratio p.value

WT Ant - KO Ant -9.54 5.090 5.19 -28.05 8.973 -1.874 0.3403

WT Ant - WT Veh -2.60 0.916 5.00 -5.98 0.776 -2.842 0.1203

WT Ant - KO Veh -18.88 5.090 5.19 -37.39 -0.373 -3.711 0.0464

KO Ant - WT Veh 6.93 5.090 5.19 -11.58 25.446 1.363 0.5669

KO Ant - KO Veh -9.35 1.060 5.00 -13.25 -5.445 -8.840 0.0012

WT Veh - KO Veh -16.28 5.090 5.19 -34.79 2.229 -3.199 0.0791

Degrees-of-freedom method: kenward-roger

Confidence level used: 0.95

Conf-level adjustment: tukey method for comparing a family of 4 estimates

P value adjustment: tukey method for comparing a family of 4 estimates

**TREM2:**

We fitted a linear mixed model to predict positive_cells_mean with genotype and treatment. The model included clone as random effect. The model's total explanatory power is substantial (conditional R2 = 0.99) and the part related to the fixed effects alone (marginal R2) is of 0.87. The model's intercept is at 11.10 (95% CI [3.30, 18.89]).

Within this model:

- The effect of genotype [KO] is statistically significant and positive (beta = 29.03, 95% CI [17.13, 40.93], t(8) = 5.63, p < .001, Std. beta = 1.60)

- The effect of treatment [Veh] is statistically non-significant and negative (beta = -1.17, 95% CI [-3.72, 1.37], t(8) = -1.06, p = 0.318, Std. beta = -0.06)

- The effect of genotype [KO] × treatment [Veh] is statistically significant and positive (beta = 8.16, 95% CI [4.27, 12.05], t(8) = 4.84, p = 0.001, Std. beta =

0.45)

emmeans:

contrast estimate SE df lower.CL upper.CL t.ratio p.value

WT Ant - KO Ant -29.03 5.16 5.27 -47.7 -10.37 -5.625 0.0079

WT Ant - WT Veh 1.18 1.10 5.00 -2.9 5.25 1.065 0.7234

WT Ant - KO Veh -36.02 5.16 5.27 -54.7 -17.35 -6.978 0.0029

KO Ant - WT Veh 30.21 5.16 5.27 11.5 48.87 5.853 0.0066

KO Ant - KO Veh -6.98 1.27 5.00 -11.7 -2.28 -5.480 0.0103

WT Veh - KO Veh -37.19 5.16 5.27 -55.9 -18.52 -7.206 0.0025

Degrees-of-freedom method: kenward-roger

Confidence level used: 0.95

Conf-level adjustment: tukey method for comparing a family of 4 estimates

P value adjustment: tukey method for comparing a family of 4 estimates

**Figure 9: XXX**

**Figure 9C: Cluster proportion in tMGL**

**Figure 9E: CD9 expression in tMGL**

**Figure 9G: A1 reactive astrocyte score**

**Figure 9H: Ab42/40 ratio**

**Supplementary Figure 4:MEF2C loss does not exacerbate inflammatory responses to LPS or IFNγ stimulation**

**Supplementary Figure 4D: Cytokine ELISA in iMGLs**

**IL1B**

We fitted a linear mixed model to predict concentration_mean with genotype, treatment and batch. The model included clone as random effect. The model's total explanatory power is moderate (conditional R2 = 0.25) and the part related to the fixed effects alone (marginal R2) is of 0.16. The model's intercept is at 22.63 (95% CI [17.06, 28.19]).

Within this model:

- The effect of genotype [KO] is statistically non-significant and negative (beta = -2.19, 95% CI [-9.39, 5.00], t(25) = -0.63, p = 0.536, Std. beta = -0.32)

- The effect of treatment [LPS] is statistically non-significant and negative (beta = -0.05, 95% CI [-6.45, 6.34], t(25) = -0.02, p = 0.987, Std. beta = -7.81e-03)

- The effect of batch [B2] is statistically non-significant and negative (beta = -4.43, 95% CI [-8.95, 0.10], t(25) = -2.02, p = 0.055, Std. beta = -0.66)

- The effect of genotype [KO] × treatment [LPS] is statistically non-significant and negative (beta = -1.87, 95% CI [-10.91, 7.18], t(25) = -0.43, p = 0.674, Std. beta = -0.28)

emmeans:

contrast estimate SE df lower.CL upper.CL t.ratio p.value

KO_LPS - KO_NT -1.9218 3.11 21.0 -10.58 6.73 -0.619 0.9249

KO_LPS - WT_LPS -4.0603 3.49 14.6 -14.16 6.04 -1.162 0.6586

KO_LPS - WT_NT -4.1131 3.49 14.6 -14.21 5.99 -1.177 0.6497

KO_NT - WT_LPS -2.1385 3.49 14.6 -12.24 7.96 -0.612 0.9266

KO_NT - WT_NT -2.1913 3.49 14.6 -12.29 7.91 -0.627 0.9216

WT_LPS - WT_NT -0.0527 3.11 21.0 -8.71 8.60 -0.017 1.0000

Results are averaged over the levels of: batch

Degrees-of-freedom method: kenward-roger

Confidence level used: 0.95

Conf-level adjustment: tukey method for comparing a family of 4 estimates

P value adjustment: tukey method for comparing a family of 4 estimates

**IL6**

We fitted a linear mixed model to predict concentration_mean with genotype, treatment and batch. The model included clone as randomeffect. The model's total explanatory power is substantial (conditional R2 = 0.36) and the part related to the fixed effects alone(marginal R2) is of 0.27. The model's intercept is at 13.82 (95% CI [3.54, 24.10]).

Within this model:

- The effect of genotype [KO] is statistically non-significant and positive (beta = 1.04, 95% CI [-12.25, 14.33], t(25) = 0.16, p = 0.873, Std. beta = 0.08)

- The effect of treatment [LPS] is statistically non-significant and positive (beta = 6.83, 95% CI [-4.95, 18.61], t(25) = 1.19, p = 0.244, Std. beta = 0.50)

- The effect of batch [B2] is statistically non-significant and positive (beta = 3.99, 95% CI [-4.34, 12.32], t(25) = 0.99, p = 0.333, Std. beta = 0.29)

- The effect of genotype [KO] × treatment [LPS] is statistically non-significant and positive (beta = 10.05, 95% CI [-6.61, 26.71], t(25) = 1.24, p = 0.226, Std. beta = 0.74)

emmeans:

contrast estimate SE df lower.CL upper.CL t.ratio p.value

KO_LPS - KO_NT 16.88 5.72 21.0 0.936 32.8 2.951 0.0355

KO_LPS - WT_LPS 11.09 6.45 14.5 -7.576 29.8 1.719 0.3496

KO_LPS - WT_NT 17.92 6.45 14.5 -0.746 36.6 2.777 0.0619

KO_NT - WT_LPS -5.79 6.45 14.5 -24.456 12.9 -0.897 0.8064

KO_NT - WT_NT 1.04 6.45 14.5 -17.626 19.7 0.161 0.9984

WT_LPS - WT_NT 6.83 5.72 21.0 -9.114 22.8 1.194 0.6372

Results are averaged over the levels of: batch

Degrees-of-freedom method: kenward-roger

Confidence level used: 0.95

Conf-level adjustment: tukey method for comparing a family of 4 estimates

P value adjustment: tukey method for comparing a family of 4 estimates

**TNFA**

We fitted a linear mixed model to predict concentration_mean with genotype, treatment and batch. The model included clone as random effect. The model's total explanatory power is substantial (conditional R2 = 0.47) and the part related to the fixed effects alone (marginal R2) is of 0.23. The model's intercept is at 13.67 (95% CI [-7.25, 34.59]).

Within this model:

- The effect of genotype [KO] is statistically non-significant and positive (beta = 5.46, 95% CI [-22.35, 33.27], t(25) = 0.40, p = 0.689, Std. beta = 0.22)

- The effect of treatment [LPS] is statistically non-significant and positive (beta = 6.28, 95% CI [-13.94, 26.50], t(25) = 0.64, p = 0.528, Std. beta = 0.25)

- The effect of batch [B2] is statistically significant and positive (beta = 23.98, 95% CI [9.68, 38.28], t(25) = 3.45, p = 0.002, Std. beta = 0.95)

- The effect of genotype [KO] × treatment [LPS] is statistically non-significant and negative (beta = -0.86, 95% CI [-29.45, 27.74], t(25) = -0.06, p = 0.951, Std.

beta = -0.03)

emmeans

contrast estimate SE df lower.CL upper.CL t.ratio p.value

WT NT - KO NT -5.461 13.50 10.7 -46.3 35.4 -0.404 0.9765

WT NT - WT LPS -6.281 9.82 21.0 -33.6 21.1 -0.640 0.9179

WT NT - KO LPS -10.883 13.50 10.7 -51.7 29.9 -0.806 0.8502

KO NT - WT LPS -0.819 13.50 10.7 -41.6 40.0 -0.061 0.9999

KO NT - KO LPS -5.422 9.82 21.0 -32.8 21.9 -0.552 0.9449

WT LPS - KO LPS -4.603 13.50 10.7 -45.4 36.2 -0.341 0.9856

Results are averaged over the levels of: batch

Degrees-of-freedom method: kenward-roger

Confidence level used: 0.95

Conf-level adjustment: tukey method for comparing a family of 4 estimates

P value adjustment: tukey method for comparing a family of 4 estimates

**CCL2**

We fitted a linear mixed model to predict concentration_mean with genotype, treatment and batch. The model included clone as random effect. The model's total explanatory power is substantial (conditional R2 = 0.69) and the part related to the fixed effects alone (marginal R2) is of 0.22. The model's intercept is at 642.92 (95% CI [250.37, 1035.47]). Within this model:

- The effect of genotype [KO] is statistically non-significant and positive (beta = 341.38, 95% CI [-197.07, 879.82], t(25) = 1.31, p = 0.204, Std. beta = 0.79)

- The effect of treatment [LPS] is statistically significant and positive (beta = 400.99, 95% CI [130.67, 671.31], t(25) = 3.06, p = 0.005, Std. beta = 0.92)

- The effect of batch [B2] is statistically non-significant and negative (beta = -42.01, 95% CI [-233.16, 149.13], t(25) = -0.45, p = 0.655, Std. beta = -0.10)

- The effect of genotype [KO] × treatment [LPS] is statistically non-significant and negative (beta = -136.46, 95% CI [-518.75, 245.83], t(25) = -0.74, p = 0.469,

Std. beta = -0.31)

emmeans:

contrast estimate SE df lower.CL upper.CL t.ratio p.value

WT NT - KO NT -341.4 261 7.81 -1183 500.6 -1.306 0.5851

WT NT - WT LPS -401.0 131 21.00 -767 -35.1 -3.055 0.0284

WT NT - KO LPS -605.9 261 7.81 -1448 236.1 -2.318 0.1746

KO NT - WT LPS -59.6 261 7.81 -902 782.4 -0.228 0.9955

KO NT - KO LPS -264.5 131 21.00 -630 101.3 -2.015 0.2141

WT LPS - KO LPS -204.9 261 7.81 -1047 637.0 -0.784 0.8598

Results are averaged over the levels of: batch

Degrees-of-freedom method: kenward-roger

Confidence level used: 0.95

Conf-level adjustment: tukey method for comparing a family of 4 estimates

P value adjustment: tukey method for comparing a family of 4 estimates

**Supplementary Figure 4E: Cytokine expression level in THP-1 macrophages (qPCR)**

**CCL2**

We fitted a linear mixed model to predict log2FC with Genotype and Treatment. The model included Batch as random effect. The model's total explanatory power is substantial (conditional R2 = 1.00) and the part related to the fixed effects alone (marginal R2) is of 0.99. The model's intercept is at 1.09 (95% CI [0.68, 1.50]).

Within this model:

- The effect of Genotype [SCR] is statistically significant and negative (beta = -1.11, 95% CI [-1.35, -0.87], t(37) = -9.55, p < .001, Std. beta = -0.29)

- The effect of Treatment [IFNg] is statistically significant and positive (beta = 4.56, 95% CI [4.24, 4.88], t(37) = 28.96, p < .001, Std. beta = 1.18)

- The effect of Treatment [LPS] is statistically significant and positive (beta = 7.86, 95% CI [7.62, 8.11], t(37) = 65.03, p < .001, Std. beta = 2.04)

- The effect of Genotype [SCR] × Treatment [IFNg] is statistically non-significant and positive (beta = 0.40, 95% CI [-0.04, 0.83], t(37) = 1.86, p = 0.071, Std.

beta = 0.10)

- The effect of Genotype [SCR] × Treatment [LPS] is statistically significant and positive (beta = 0.98, 95% CI [0.64, 1.33], t(37) = 5.84, p < .001, Std. beta =

0.26)

emmeans

contrast estimate SE df lower.CL upper.CL t.ratio p.value

KD IFNg - SCR IFNg 0.714 0.179 36.0 0.177 1.25 4.000 0.0038

KD IFNg - KD LPS -3.308 0.161 36.2 -3.791 -2.82 -20.594 <.0001

KD IFNg - SCR LPS -3.182 0.158 36.4 -3.657 -2.71 -20.150 <.0001

KD IFNg - KD NT 4.556 0.158 36.4 4.081 5.03 28.852 <.0001

KD IFNg - SCR NT 5.666 0.159 36.3 5.188 6.14 35.661 <.0001

SCR IFNg - KD LPS -4.022 0.161 36.2 -4.505 -3.54 -25.040 <.0001

SCR IFNg - SCR LPS -3.896 0.158 36.4 -4.371 -3.42 -24.673 <.0001

SCR IFNg - KD NT 3.842 0.158 36.4 3.367 4.32 24.330 <.0001

SCR IFNg - SCR NT 4.952 0.159 36.3 4.474 5.43 31.166 <.0001

KD LPS - SCR LPS 0.126 0.121 36.1 -0.238 0.49 1.039 0.9014

KD LPS - KD NT 7.864 0.121 36.1 7.500 8.23 64.987 <.0001

KD LPS - SCR NT 8.974 0.123 36.0 8.604 9.34 72.923 <.0001

SCR LPS - KD NT 7.738 0.113 36.0 7.399 8.08 68.534 <.0001

SCR LPS - SCR NT 8.848 0.116 36.0 8.499 9.20 76.106 <.0001

KD NT - SCR NT 1.110 0.116 36.0 0.760 1.46 9.547 <.0001

Degrees-of-freedom method: kenward-roger

Confidence level used: 0.95

Conf-level adjustment: tukey method for comparing a family of 6 estimates

P value adjustment: tukey method for comparing a family of 6 estimates

**CCL3**

We fitted a linear mixed model to predict log2FC with Genotype and Treatment. The model included Batch as random effect. The model's total explanatory power is substantial (conditional R2 = 0.97) and the part related to the fixed effects alone (marginal R2) is of 0.74. The model's intercept is at 0.72 (95% CI [-0.54, 1.98]).

Within this model:

- The effect of Genotype [SCR] is statistically significant and negative (beta = -0.57, 95% CI [-0.99, -0.15], t(37) = -2.77, p = 0.009, Std. beta = -0.25)

- The effect of Treatment [IFNg] is statistically significant and negative (beta = -0.80, 95% CI [-1.36, -0.23], t(37) = -2.85, p = 0.007, Std. beta = -0.35)

- The effect of Treatment [LPS] is statistically significant and positive (beta = 4.22, 95% CI [3.79, 4.65], t(37) = 19.68, p < .001, Std. beta = 1.84)

- The effect of Genotype [SCR] × Treatment [IFNg] is statistically non-significant and positive (beta = 0.50, 95% CI [-0.27, 1.26], t(37) = 1.32, p = 0.196, Std.

beta = 0.22)

- The effect of Genotype [SCR] × Treatment [LPS] is statistically non-significant and positive (beta = 0.04, 95% CI [-0.56, 0.65], t(37) = 0.14, p = 0.893, Std.

beta = 0.02)

emmeans

contrast estimate SE df lower.CL upper.CL t.ratio p.value

KD IFNg - SCR IFNg 0.0749 0.316 36.0 -0.8772 1.0270 0.237 0.9999

KD IFNg - KD LPS -5.0175 0.285 36.1 -5.8735 -4.1614 -17.631 <.0001

KD IFNg - SCR LPS -4.4863 0.280 36.1 -5.3277 -3.6449 -16.038 <.0001

KD IFNg - KD NT -0.7976 0.280 36.1 -1.6390 0.0439 -2.851 0.0717

KD IFNg - SCR NT -0.2258 0.281 36.1 -1.0725 0.6210 -0.802 0.9653

SCR IFNg - KD LPS -5.0923 0.285 36.1 -5.9484 -4.2362 -17.894 <.0001

SCR IFNg - SCR LPS -4.5612 0.280 36.1 -5.4026 -3.7197 -16.306 <.0001

SCR IFNg - KD NT -0.8725 0.280 36.1 -1.7139 -0.0310 -3.119 0.0384

SCR IFNg - SCR NT -0.3007 0.281 36.1 -1.1474 0.5461 -1.068 0.8907

KD LPS - SCR LPS 0.5312 0.214 36.0 -0.1141 1.1764 2.477 0.1581

KD LPS - KD NT 4.2199 0.214 36.0 3.5746 4.8651 19.675 <.0001

KD LPS - SCR NT 4.7917 0.218 36.0 4.1354 5.4479 21.967 <.0001

SCR LPS - KD NT 3.6887 0.200 36.0 3.0865 4.2909 18.430 <.0001

SCR LPS - SCR NT 4.2605 0.206 36.0 3.6405 4.8805 20.674 <.0001

KD NT - SCR NT 0.5718 0.206 36.0 -0.0482 1.1918 2.775 0.0851

Degrees-of-freedom method: kenward-roger

Confidence level used: 0.95

Conf-level adjustment: tukey method for comparing a family of 6 estimates

P value adjustment: tukey method for comparing a family of 6 estimates

**IL10**

We fitted a linear mixed model to predict log2FC with Genotype and Treatment. The model included Batch as random effect. The model's total explanatory power is substantial (conditional R2 = 0.97) and the part related to the fixed effects alone (marginal R2) is of 0.65. The model's intercept is at 0.33 (95% CI [-1.01, 1.67]).

Within this model:

- The effect of Genotype [SCR] is statistically non-significant and negative (beta = -0.31, 95% CI [-0.69, 0.07], t(37) = -1.67, p = 0.103, Std. beta = -0.16)

- The effect of Treatment [IFNg] is statistically significant and negative (beta = -2.70, 95% CI [-3.21, -2.19], t(37) = -10.72, p < .001, Std. beta = -1.42)

- The effect of Treatment [LPS] is statistically significant and positive (beta = 1.98, 95% CI [1.59, 2.37], t(37) = 10.22, p < .001, Std. beta = 1.04)

- The effect of Genotype [SCR] × Treatment [IFNg] is statistically non-significant and positive (beta = 0.16, 95% CI [-0.53, 0.85], t(37) = 0.48, p = 0.637, Std.

beta = 0.09)

- The effect of Genotype [SCR] × Treatment [LPS] is statistically significant and positive (beta = 0.84, 95% CI [0.29, 1.39], t(37) = 3.12, p = 0.004, Std. beta

= 0.44)

emmeans

contrast estimate SE df lower.CL upper.CL t.ratio p.value

KD IFNg - SCR IFNg 0.149 0.285 36.0 -0.710 1.0075 0.522 0.9949

KD IFNg - KD LPS -4.678 0.257 36.0 -5.450 -3.9061 -18.230 <.0001

KD IFNg - SCR LPS -5.207 0.252 36.1 -5.965 -4.4478 -20.643 <.0001

KD IFNg - KD NT -2.701 0.252 36.1 -3.460 -1.9423 -10.709 <.0001

KD IFNg - SCR NT -2.390 0.254 36.1 -3.153 -1.6263 -9.416 <.0001

SCR IFNg - KD LPS -4.827 0.257 36.0 -5.599 -4.0550 -18.810 <.0001

SCR IFNg - SCR LPS -5.356 0.252 36.1 -6.114 -4.5968 -21.233 <.0001

SCR IFNg - KD NT -2.850 0.252 36.1 -3.609 -2.0912 -11.299 <.0001

SCR IFNg - SCR NT -2.539 0.254 36.1 -3.302 -1.7752 -10.002 <.0001

KD LPS - SCR LPS -0.529 0.193 36.0 -1.110 0.0533 -2.733 0.0932

KD LPS - KD NT 1.977 0.193 36.0 1.395 2.5589 10.222 <.0001

KD LPS - SCR NT 2.288 0.197 36.0 1.696 2.8800 11.632 <.0001

SCR LPS - KD NT 2.506 0.180 36.0 1.963 3.0486 13.882 <.0001

SCR LPS - SCR NT 2.817 0.186 36.0 2.258 3.3758 15.156 <.0001

KD NT - SCR NT 0.311 0.186 36.0 -0.248 0.8703 1.674 0.5569

Degrees-of-freedom method: kenward-roger

Confidence level used: 0.95

Conf-level adjustment: tukey method for comparing a family of 6 estimates

P value adjustment: tukey method for comparing a family of 6 estimates

**IL1B**

We fitted a linear mixed model to predict log2FC with Genotype and Treatment. The model included Batch as random effect. The model's total explanatory power is substantial (conditional R2 = 0.96) and the part related to the fixed effects alone (marginal R2) is of 0.90. The model's intercept is at 0.20 (95% CI [-0.41, 0.81]).

Within this model:

- The effect of Genotype [SCR] is statistically non-significant and negative (beta = -0.25, 95% CI [-0.69, 0.19], t(37) = -1.15, p = 0.259, Std. beta = -0.11)

- The effect of Treatment [IFNg] is statistically significant and positive (beta = 1.75, 95% CI [1.16, 2.34], t(37) = 5.98, p < .001, Std. beta = 0.78)

- The effect of Treatment [LPS] is statistically significant and positive (beta = 4.85, 95% CI [4.39, 5.31], t(37) = 21.51, p < .001, Std. beta = 2.16)

- The effect of Genotype [SCR] × Treatment [IFNg] is statistically non-significant and positive (beta = 0.31, 95% CI [-0.49, 1.12], t(37) = 0.79, p = 0.434, Std.

beta = 0.14)

- The effect of Genotype [SCR] × Treatment [LPS] is statistically non-significant and negative (beta = -0.33, 95% CI [-0.96, 0.31], t(37) = -1.04, p = 0.305,

Std. beta = -0.15)

emmeans

contrast estimate SE df lower.CL upper.CL t.ratio p.value

KD IFNg - SCR IFNg -0.0655 0.333 36.0 -1.067 0.936 -0.197 1.0000

KD IFNg - KD LPS -3.0978 0.300 36.4 -3.999 -2.197 -10.339 <.0001

KD IFNg - SCR LPS -2.5228 0.295 36.6 -3.408 -1.637 -8.562 <.0001

KD IFNg - KD NT 1.7506 0.295 36.6 0.865 2.636 5.941 <.0001

KD IFNg - SCR NT 1.9992 0.296 36.5 1.108 2.890 6.744 <.0001

SCR IFNg - KD LPS -3.0323 0.300 36.4 -3.933 -2.131 -10.120 <.0001

SCR IFNg - SCR LPS -2.4573 0.295 36.6 -3.343 -1.572 -8.340 <.0001

SCR IFNg - KD NT 1.8160 0.295 36.6 0.930 2.702 6.164 <.0001

SCR IFNg - SCR NT 2.0647 0.296 36.5 1.173 2.956 6.965 <.0001

KD LPS - SCR LPS 0.5750 0.226 36.1 -0.104 1.254 2.548 0.1370

KD LPS - KD NT 4.8484 0.226 36.1 4.170 5.527 21.486 <.0001

KD LPS - SCR NT 5.0970 0.229 36.0 4.407 5.787 22.213 <.0001

SCR LPS - KD NT 4.2733 0.211 36.0 3.640 4.907 20.298 <.0001

SCR LPS - SCR NT 4.5219 0.217 36.0 3.870 5.174 20.860 <.0001

KD NT - SCR NT 0.2486 0.217 36.0 -0.404 0.901 1.147 0.8583

Degrees-of-freedom method: kenward-roger

Confidence level used: 0.95

Conf-level adjustment: tukey method for comparing a family of 6 estimates

P value adjustment: tukey method for comparing a family of 6 estimates

**IL6**

We fitted a linear mixed model to predict log2FC with Genotype and Treatment. The model included Batch as random effect. The model's total explanatory power is substantial (conditional R2 = 0.99) and the part related to the fixed effects alone (marginal R2) is of 0.97. The model's intercept is at 0.11 (95% CI [-0.48, 0.70]).

Within this model:

- The effect of Genotype [SCR] is statistically non-significant and negative (beta = -0.17, 95% CI [-0.56, 0.22], t(37) = -0.89, p = 0.380, Std. beta = -0.04)

- The effect of Treatment [IFNg] is statistically significant and positive (beta = 4.60, 95% CI [4.08, 5.12], t(37) = 17.82, p < .001, Std. beta = 1.12)

- The effect of Treatment [LPS] is statistically significant and positive (beta = 9.00, 95% CI [8.59, 9.40], t(37) = 45.29, p < .001, Std. beta = 2.19)

- The effect of Genotype [SCR] × Treatment [IFNg] is statistically non-significant and negative (beta = -0.41, 95% CI [-1.11, 0.30], t(37) = -1.16, p = 0.254,

Std. beta = -0.10)

- The effect of Genotype [SCR] × Treatment [LPS] is statistically non-significant and negative (beta = -0.19, 95% CI [-0.75, 0.37], t(37) = -0.69, p = 0.497,

Std. beta = -0.05)

emmeans

contrast estimate SE df lower.CL upper.CL t.ratio p.value

KD IFNg - SCR IFNg 0.575 0.293 36.0 -0.307 1.457 1.960 0.3840

KD IFNg - KD LPS -4.395 0.264 36.3 -5.189 -3.602 -16.652 <.0001

KD IFNg - SCR LPS -4.036 0.260 36.5 -4.816 -3.255 -15.550 <.0001

KD IFNg - KD NT 4.601 0.260 36.5 3.820 5.381 17.726 <.0001

KD IFNg - SCR NT 4.770 0.261 36.4 3.985 5.555 18.269 <.0001

SCR IFNg - KD LPS -4.970 0.264 36.3 -5.764 -4.177 -18.831 <.0001

SCR IFNg - SCR LPS -4.611 0.260 36.5 -5.391 -3.830 -17.765 <.0001

SCR IFNg - KD NT 4.026 0.260 36.5 3.245 4.806 15.511 <.0001

SCR IFNg - SCR NT 4.195 0.261 36.4 3.410 4.980 16.067 <.0001

KD LPS - SCR LPS 0.360 0.199 36.1 -0.238 0.958 1.809 0.4729

KD LPS - KD NT 8.996 0.199 36.1 8.398 9.594 45.248 <.0001

KD LPS - SCR NT 9.166 0.202 36.0 8.557 9.774 45.336 <.0001

SCR LPS - KD NT 8.636 0.185 36.0 8.078 9.194 46.558 <.0001

SCR LPS - SCR NT 8.806 0.191 36.0 8.231 9.381 46.104 <.0001

KD NT - SCR NT 0.170 0.191 36.0 -0.405 0.744 0.889 0.9468

Degrees-of-freedom method: kenward-roger

Confidence level used: 0.95

Conf-level adjustment: tukey method for comparing a family of 6 estimates

P value adjustment: tukey method for comparing a family of 6 estimates

**TNFA**

We fitted a linear mixed model to predict log2FC with Genotype and Treatment. The model included Batch as random effect. The model's total explanatory power is substantial (conditional R2 = 0.96) and the part related to the fixed effects alone (marginal R2) is of 0.62. The model's intercept is at 0.06 (95% CI [-1.07, 1.19]).

Within this model:

- The effect of Genotype [SCR] is statistically non-significant and negative (beta = -0.20, 95% CI [-0.53, 0.13], t(36) = -1.21, p = 0.233, Std. beta = -0.11)

- The effect of Treatment [IFNg] is statistically significant and positive (beta = 2.12, 95% CI [1.67, 2.58], t(36) = 9.49, p < .001, Std. beta = 1.18)

- The effect of Treatment [LPS] is statistically significant and positive (beta = 3.00, 95% CI [2.63, 3.37], t(36) = 16.51, p < .001, Std. beta = 1.67)

- The effect of Genotype [SCR] × Treatment [IFNg] is statistically non-significant and negative (beta = -0.37, 95% CI [-0.99, 0.24], t(36) = -1.24, p = 0.223,

Std. beta = -0.21)

- The effect of Genotype [SCR] × Treatment [LPS] is statistically non-significant and positive (beta = 0.32, 95% CI [-0.18, 0.82], t(36) = 1.30, p = 0.201, Std.

beta = 0.18)

**emmeans**

contrast estimate SE df lower.CL upper.CL t.ratio p.value

KD IFNg - SCR IFNg 0.574 0.253 35.0 -0.188 1.336 2.271 0.2330

KD IFNg - KD LPS -0.877 0.232 35.0 -1.575 -0.179 -3.784 0.0071

KD IFNg - SCR LPS -0.999 0.224 35.1 -1.674 -0.324 -4.458 0.0011

KD IFNg - KD NT 2.124 0.224 35.1 1.449 2.799 9.478 <.0001

KD IFNg - SCR NT 2.323 0.225 35.1 1.645 3.002 10.316 <.0001

SCR IFNg - KD LPS -1.451 0.232 35.0 -2.149 -0.753 -6.262 <.0001

SCR IFNg - SCR LPS -1.573 0.224 35.1 -2.248 -0.898 -7.021 <.0001

SCR IFNg - KD NT 1.549 0.224 35.1 0.874 2.225 6.915 <.0001

SCR IFNg - SCR NT 1.749 0.225 35.1 1.071 2.428 7.767 <.0001

KD LPS - SCR LPS -0.122 0.182 35.1 -0.670 0.426 -0.673 0.9838

KD LPS - KD NT 3.000 0.182 35.1 2.452 3.548 16.500 <.0001

KD LPS - SCR NT 3.200 0.183 35.0 2.648 3.752 17.463 <.0001

SCR LPS - KD NT 3.123 0.160 35.0 2.641 3.604 19.527 <.0001

SCR LPS - SCR NT 3.322 0.165 35.0 2.826 3.818 20.171 <.0001

KD NT - SCR NT 0.200 0.165 35.0 -0.297 0.696 1.212 0.8281

Degrees-of-freedom method: kenward-roger

Confidence level used: 0.95

Conf-level adjustment: tukey method for comparing a family of 6 estimates

P value adjustment: tukey method for comparing a family of 6 estimates

**Supplementary Figure 5: MEF2C knockdown in human iPSC-derived microglia induces a disease-associated transcriptional and proteomic signature**

**Supplementary Figure 5B: DLAM expression in MEF2C-KD iMGLs (qPCR)**

**ABCA1**

We fitted a linear mixed model to predict log2FC with Genotype. The model included Batch as random effects. The model's total explanatory power is substantial (conditional R2 = 0.91) and the part related to the fixed effects alone (marginal R2) is of 0.02. The model's intercept is at 0.89 (95% CI [-0.43, 2.21]).

Within this model:

- The effect of Genotype [SCR] is statistically significant and negative (beta = -0.44, 95% CI [-0.86, -0.02], t(16) = -2.24, p = 0.040, Std. beta = -0.32)

emmeans

contrast estimate SE df lower.CL upper.CL t.ratio p.value

(MEF2C-KD) - SCR 0.441 0.197 13.1 0.015 0.867 2.236 0.0435

Degrees-of-freedom method: kenward-roger

Confidence level used: 0.95

**APOC1**

We fitted a linear mixed model to predict log2FC with Genotype. The model included Batch as random effects. The model's total explanatory power is substantial (conditional R2 = 0.98) and the part related to the fixed effects alone (marginal R2) is of 0.02. The model's intercept is at 0.78 (95% CI [-0.64, 2.20]).

Within this model:

- The effect of Genotype [SCR] is statistically significant and negative (beta = -0.42, 95% CI [-0.61, -0.22], t(16) = -4.46, p < .001, Std. beta = -0.31)

emmeans

contrast estimate SE df lower.CL upper.CL t.ratio p.value

(MEF2C-KD) - SCR 0.415 0.0932 13 0.214 0.617 4.456 0.0006

Degrees-of-freedom method: kenward-roger

Confidence level used: 0.95

**APOE**

We fitted a linear mixed model to predict log2FC with Genotype. The model included Batch as random effects. The model's total explanatory power is substantial (conditional R2 = 0.95) and the part related to the fixed effects alone (marginal R2) is of 0.03. The model's intercept is at 0.57 (95% CI [-0.93, 2.07]).

Withinthis model:

- The effect of Genotype [SCR] is statistically significant and negative (beta = -0.51, 95% CI [-0.83, -0.18], t(16) = -3.32, p = 0.004, Std. beta = -0.36)

emmeans

contrast estimate SE df lower.CL upper.CL t.ratio p.value

(MEF2C-KD) - SCR 0.508 0.154 13.4 0.175 0.841 3.289 0.0057

Degrees-of-freedom method: kenward-roger

Confidence level used: 0.95

**CCL2**

We fitted a linear mixed model to predict log2FC with Genotype. The model included Batch as random effects. The model's total explanatory power is substantial (conditional R2 = 0.91) and the part related to the fixed effects alone (marginal R2) is of 0.04. The model's intercept is at 0.34 (95% CI [-0.41, 1.09]).

Within this model:

- The effect of Genotype [SCR] is statistically significant and negative (beta = -0.31, 95% CI [-0.53, -0.10], t(16) = -3.06, p = 0.008, Std. beta = -0.45)

**emmeans**

contrast estimate SE df lower.CL upper.CL t.ratio p.value

(MEF2C-KD) - SCR 0.311 0.102 13.1 0.0905 0.531 3.046 0.0093

Degrees-of-freedom method: kenward-roger

Confidence level used: 0.95

**CD11C**

We fitted a linear mixed model to predict log2FC with Genotype. The model included Batch as random effects. The model's explanatory power related to the fixed effects alone (marginal R2) is 9.30e-03. The model's intercept is at -0.07 (95% CI [-0.48, 0.34]).

Within this model:

- The effect of Genotype [SCR] is statistically non-significant and negative (beta = -0.02, 95% CI [-0.12, 0.08], t(16) = -0.42, p = 0.680, Std. beta = -0.04)

emmeans

contrast estimate SE df lower.CL upper.CL t.ratio p.value

(MEF2C-KD) - SCR 0.0198 0.0472 13 -0.0822 0.122 0.420 0.6816

Degrees-of-freedom method: kenward-roger

Confidence level used: 0.95

**CD63**

We fitted a linear mixed model to predict log2FC with Genotype. The model included Batch as random effects. The model's explanatory power related to the fixed effects alone (marginal R2) is 0.19. The model's intercept is at 0.16 (95% CI [-0.03, 0.36]).

Within this model:

- The effect of Genotype [SCR] is statistically non-significant and negative (beta = -0.10, 95% CI [-0.20, 1.94e-03], t(16) = -2.08, p = 0.054, Std. beta = -0.39)

emmeans

contrast estimate SE df lower.CL upper.CL t.ratio p.value

(MEF2C-KD) - SCR 0.0971 0.0468 13.1 -0.00404 0.198 2.073 0.0585

Degrees-of-freedom method: kenward-roger

Confidence level used: 0.95

**CD9**

We fitted a linear mixed model to predict log2FC with Genotype. The model included Batch as random effects. The model's total explanatory power is substantial (conditional R2 = 0.93) and the part related to the fixed effects alone (marginal R2) is of 0.01. The model's intercept is at 0.12 (95% CI [-0.53, 0.77]).

Within this model:

- The effect of Genotype [SCR] is statistically non-significant and negative (beta = -0.14, 95% CI [-0.31, 0.03], t(16) = -1.79, p = 0.092, Std. beta = -0.24)

emmeans

contrast estimate SE df lower.CL upper.CL t.ratio p.value

(MEF2C-KD) - SCR 0.14 0.0783 13.1 -0.0291 0.309 1.787 0.0971

Degrees-of-freedom method: kenward-roger

Confidence level used: 0.95

**CTSB**

We fitted a linear mixed model to predict log2FC with Genotype. The model included Batch as random effects. The model's explanatory power related to the fixed effects alone (marginal R2) is 0.25. The model's intercept is at 0.29 (95% CI [-0.18, 0.75]).

Within this model:

- The effect of Genotype [SCR] is statistically significant and negative (beta = -0.18, 95% CI [-0.34, -0.03], t(16) = -2.51, p = 0.023, Std. beta = -0.31)

emmeans

contrast estimate SE df lower.CL upper.CL t.ratio p.value

(MEF2C-KD) - SCR 0.182 0.0725 13 0.0252 0.338 2.508 0.0262

Degrees-of-freedom method: kenward-roger

Confidence level used: 0.95

**CTSZ**

We fitted a linear mixed model to predict log2FC with Genotype. The model included Batch as random effects. The model's explanatory power related to the fixed effects alone (marginal R2) is 0.40. The model's intercept is at 0.36 (95% CI [-0.02, 0.74]).

Within this model:

- The effect of Genotype [SCR] is statistically significant and negative (beta = -0.18, 95% CI [-0.29, -0.07], t(16) = -3.55, p = 0.003, Std. beta = -0.36)

emmeans

contrast estimate SE df lower.CL upper.CL t.ratio p.value

(MEF2C-KD) - SCR 0.182 0.0512 13 0.0711 0.292 3.548 0.0036

Degrees-of-freedom method: kenward-roger

Confidence level used: 0.95

**CX3CR1**

We fitted a linear mixed model to predict log2FC with Genotype. The model included Batch as random effects. The model's total explanatory power is substantial (conditional R2 = 0.88) and the part related to the fixed effects alone (marginal R2) is of 0.04. The model's intercept is at -0.50 (95% CI [-1.36, 0.36]).

Within this model:

- The effect of Genotype [SCR] is statistically significant and positive (beta = 0.36, 95% CI [0.05, 0.67], t(16) = 2.46, p = 0.026, Std. beta = 0.44)

emmeans

contrast estimate SE df lower.CL upper.CL t.ratio p.value

(MEF2C-KD) - SCR -0.357 0.146 13.1 -0.672 -0.0425 -2.451 0.0291

Degrees-of-freedom method: kenward-roger

Confidence level used: 0.95

**CXCR4**

We fitted a linear mixed model to predict log2FC with Genotype. The model included Batch as random effects. The model's total explanatory power is substantial (conditional R2 = 0.93) and the part related to the fixed effects alone (marginal R2) is of 1.57e-03. The model's intercept is at -0.40 (95% CI [-1.72, 0.91]).

Within this model:

- The effect of Genotype [SCR] is statistically non-significant and positive (beta = 0.12, 95% CI [-0.26, 0.50], t(16) = 0.65, p = 0.524, Std. beta = 0.08)

emmeans

contrast estimate SE df lower.CL upper.CL t.ratio p.value

(MEF2C-KD) - SCR -0.117 0.18 13 -0.505 0.271 -0.651 0.5266

Degrees-of-freedom method: kenward-roger

Confidence level used: 0.95

**FABP5**

We fitted a linear mixed model to predict log2FC with Genotype. The model included Batch as random effects. The model's total explanatory power is substantial(conditional R2 = 0.94) and the part related to the fixed effects alone (marginal R2) is of 0.01. The model's intercept is at -4.92e-03 (95% CI [-0.41, 0.40]).

Within this model:

- The effect of Genotype [SCR] is statistically non-significant and positive (beta = 0.09, 95% CI [-6.78e-04, 0.18], t(16) = 2.10, p = 0.052, Std. beta = 0.28)

emmeans

contrast estimate SE df lower.CL upper.CL t.ratio p.value

(MEF2C-KD) - SCR -0.0922 0.0439 13.1 -0.187 0.00257 -2.101 0.0556

Degrees-of-freedom method: kenward-roger

Confidence level used: 0.95

**GPNMB**

We fitted a linear mixed model to predict log2FC with Genotype. The model included Batch as random effects. The model's explanatory power related to the fixed effects alone (marginal R2) is 0.30. The model's intercept is at 0.33 (95% CI [-0.38, 1.04]).

Within this model:

- The effect of Genotype [SCR] is statistically significant and negative (beta = -0.23, 95% CI [-0.39, -0.06], t(16) = -2.84, p = 0.012, Std. beta = -0.23)

emmeans

contrast estimate SE df lower.CL upper.CL t.ratio p.value

(MEF2C-KD) - SCR 0.226 0.0795 13 0.0538 0.397 2.837 0.0140

Degrees-of-freedom method: kenward-roger

Confidence level used: 0.95

**LGALS3**

We fitted a linear mixed model to predict log2FC with Genotype. The model included Batch as random effects. The model's total explanatory power is substantial (conditional R2 = 0.91) and the part related to the fixed effects alone (marginal R2) is of 0.16. The model's intercept is at 0.71 (95% CI [0.10, 1.33]).

Within this model:

- The effect of Genotype [SCR] is statistically significant and negative (beta = -0.51, 95% CI [-0.69, -0.33], t(16) = -5.88, p < .001, Std. beta = -0.84)

emmeans

contrast estimate SE df lower.CL upper.CL t.ratio p.value

(MEF2C-KD) - SCR 0.509 0.0877 13.4 0.32 0.698 5.805 0.0001

Degrees-of-freedom method: kenward-roger

Confidence level used: 0.95

**LIPA**

We fitted a linear mixed model to predict log2FC with Genotype. The model included Batch as random effects. The model's total explanatory power is substantial (conditional R2 = 0.91) and the part related to the fixed effects alone (marginal R2) is of 0.03. The model's intercept is at 0.33 (95% CI [-0.14, 0.79]).

Within this model:

- The effect of Genotype [SCR] is statistically significant and negative (beta = -0.19, 95% CI [-0.35, -0.03], t(16) = -2.50, p = 0.024, Std. beta = -0.33)

emmeans

contrast estimate SE df lower.CL upper.CL t.ratio p.value

(MEF2C-KD) - SCR 0.187 0.0751 13.1 0.0252 0.35 2.495 0.0268

Degrees-of-freedom method: kenward-roger

Confidence level used: 0.95

**LPL**

We fitted a linear mixed model to predict log2FC with Genotype. The model included Batch as random effects. The model's explanatory power related to the fixed effects alone (marginal R2) is 0.05. The model's intercept is at -0.05 (95% CI [-1.44, 1.34]).

Within this model:

- The effect of Genotype [SCR] is statistically non-significant and positive (beta = 0.14, 95% CI [-0.16, 0.44], t(16) = 0.97, p = 0.345, Std. beta = 0.10)

**emmeans**

contrast estimate SE df lower.CL upper.CL t.ratio p.value

(MEF2C-KD) - SCR -0.138 0.144 13.5 -0.448 0.172 -0.960 0.3541

Degrees-of-freedom method: kenward-roger

Confidence level used: 0.95

**MEF2C**

We fitted a linear mixed model to predict log2FC with Genotype. The model included Batch as random effects. The model's total explanatory power is substantial (conditional R2 = 0.73) and the part related to the fixed effects alone (marginal R2) is of 0.26. The model's intercept is at -0.72 (95% CI [-1.19, -0.25]).

Within this model:

- The effect of Genotype [SCR] is statistically significant and positive (beta = 0.65, 95% CI [0.33, 0.98], t(16) = 4.27, p < .001, Std. beta = 1.03)

**emmeans**

contrast estimate SE df lower.CL upper.CL t.ratio p.value

(MEF2C-KD) - SCR -0.654 0.154 13.3 -0.987 -0.321 -4.233 0.0009

Degrees-of-freedom method: kenward-roger

Confidence level used: 0.95

**NR1H3**

We fitted a linear mixed model to predict log2FC with Genotype. The model included Batch as random effects. The model's total explanatory power is substantial (conditional R2 = 0.98) and the part related to the fixed effects alone (marginal R2) is of 0.03. The model's intercept is at 0.59 (95% CI [-0.26, 1.44]).

Within this model:

- The effect of Genotype [SCR] is statistically significant and negative (beta = -0.27, 95% CI [-0.38, -0.16], t(16) = -5.34, p < .001, Std. beta = -0.34)

emmeans

contrast estimate SE df lower.CL upper.CL t.ratio p.value

(MEF2C-KD) - SCR 0.274 0.0513 13 0.163 0.385 5.333 0.0001

Degrees-of-freedom method: kenward-roger

Confidence level used: 0.95

**P2RY12**

We fitted a linear mixed model to predict log2FC with Genotype. The model included Batch as random effects. The model's total explanatory power is substantial (conditional R2 = 0.94) and the part related to the fixed effects alone (marginal R2) is of 1.02e-03. The model's intercept is at -3.79e-03 (95% CI [-0.54, 0.53]).

Within this model:

- The effect of Genotype [SCR] is statistically non-significant and negative (beta = -0.04, 95% CI [-0.18, 0.10], t(16) = -0.58, p = 0.570, Std. beta = -0.07)

emmeans

contrast estimate SE df lower.CL upper.CL t.ratio p.value

(MEF2C-KD) - SCR 0.0387 0.0667 13 -0.105 0.183 0.580 0.5716

Degrees-of-freedom method: kenward-roger

Confidence level used: 0.95

**PLIN2**

We fitted a linear mixed model to predict log2FC with Genotype. The model included Batch as random effects. The model's total explanatory power is substantial (conditional R2 = 0.98) and the part related to the fixed effects alone (marginal R2) is of 0.02. The model's intercept is at 0.51 (95% CI [-0.26, 1.29]).

Within this model:

- The effect of Genotype [SCR] is statistically significant and negative (beta = -0.22, 95% CI [-0.32, -0.13], t(16) = -4.86, p < .001, Std. beta = -0.33)

emmeans

contrast estimate SE df lower.CL upper.CL t.ratio p.value

(MEF2C-KD) - SCR 0.225 0.0463 13 0.125 0.325 4.853 0.0003

Degrees-of-freedom method: kenward-roger

Confidence level used: 0.95

**SPP1**

We fitted a linear mixed model to predict log2FC with Genotype. The model included Batch as random effects. The model's explanatory power related to the fixed effects alone (marginal R2) is 9.77e-03. The model's intercept is at -0.08 (95% CI [-1.74, 1.57]).

Within this model:

- The effect of Genotype [SCR] is statistically non-significant and positive (beta = 0.08, 95% CI [-0.29, 0.44], t(16) = 0.43, p = 0.670, Std. beta = 0.05)

**emmeans**

contrast estimate SE df lower.CL upper.CL t.ratio p.value

(MEF2C-KD) - SCR -0.0755 0.176 13.5 -0.455 0.304 -0.428 0.6756

Degrees-of-freedom method: kenward-roger

Confidence level used: 0.95

**TREM2**

We fitted a linear mixed model to predict log2FC with Genotype. The model included Batch as random effects. The model’s total explanatory power is substantial (conditional R2 = 0.79) and the part related to the fixed effects alone (marginal R2) is of 1.66e-03. The model's intercept is at -0.08 (95% CI [-0.44, 0.27]).

Within this model:

- The effect of Genotype [SCR] is statistically non-significant and positive (beta = 0.03, 95% CI [-0.13, 0.19], t(16) = 0.39, p = 0.704, Std. beta = 0.08)

emmeans

contrast estimate SE df lower.CL upper.CL t.ratio p.value

(MEF2C-KD) - SCR -0.03 0.0781 13.2 -0.199 0.138 -0.385 0.7067

Degrees-of-freedom method: kenward-roger

Confidence level used: 0.95

**Supplementary Figure 5C: DLAM expression in MEF2C-KD iMGLs (western blot)**

**ABCA1**

We fitted a linear mixed model to predict intensity with genotype and actin_intensity_scaled. The model included batch as random effects.

The model's explanatory power related to the fixed effects alone (marginal R2) is 0.39. The model's intercept is at 7945.30 (95% CI

[3533.15, 12357.46]). Within this model:

- The effect of genotype [SCR] is statistically significant and negative (beta = -3127.91, 95% CI [-5494.92, -760.89], t(12) = -2.88, p =

0.014, Std. beta = -0.83)

- The effect of actin intensity scaled is statistically non-significant and negative (beta = -387.93, 95% CI [-1826.48, 1050.62], t(12) =

-0.59, p = 0.568, Std. beta = -0.10)

Emmeans

contrast estimate SE df lower.CL upper.CL t.ratio p.value

(MEF2C-KD) - SCR 3128 1090 7.16 551 5704 2.858 0.0238

Degrees-of-freedom method: kenward-roger

Confidence level used: 0.95

**APOE**

We fitted a linear mixed model to predict intensity with genotype and actin_intensity_scaled. The model included batch as random effects.

The model's explanatory power related to the fixed effects alone (marginal R2) is 0.04. The model's intercept is at 6994.78 (95% CI

[1332.77, 12656.80]). Within this model:

- The effect of genotype [SCR] is statistically non-significant and negative (beta = -531.47, 95% CI [-4408.95, 3346.01], t(12) = -0.30,

p = 0.770, Std. beta = -0.11)

- The effect of actin intensity scaled is statistically non-significant and positive (beta = 651.80, 95% CI [-1886.64, 3190.24], t(12) =

0.56, p = 0.586, Std. beta = 0.13)

Emmeans

contrast estimate SE df lower.CL upper.CL t.ratio p.value

(MEF2C-KD) - SCR 531 1930 9.37 -3812 4875 0.275 0.7892

Degrees-of-freedom method: kenward-roger

Confidence level used: 0.95

**GPNMB**

We fitted a linear mixed model to predict intensity with genotype and actin_intensity_scaled. The model included batch as random effects.

The model's explanatory power related to the fixed effects alone (marginal R2) is 0.45. The model's intercept is at 11119.05 (95% CI

[6568.22, 15669.89]). Within this model:

- The effect of genotype [SCR] is statistically non-significant and negative (beta = -1841.45, 95% CI [-5561.28, 1878.38], t(8) = -1.14,

p = 0.287, Std. beta = -0.34)

- The effect of actin intensity scaled is statistically non-significant and positive (beta = 2450.86, 95% CI [-131.85, 5033.57], t(8) =

2.19, p = 0.060, Std. beta = 0.45)

Emmeans

contrast estimate SE df lower.CL upper.CL t.ratio p.value

(MEF2C-KD) - SCR 1841 1620 5.16 -2287 5970 1.136 0.3059

Degrees-of-freedom method: kenward-roger

Confidence level used: 0.95

**LAMP1**

We fitted a linear mixed model to predict intensity with genotype and actin_intensity_scaled. The model included batch as random effects. The model's explanatory power related to the fixed effects

alone (marginal R2) is 0.05. The model's intercept is at 8546.33 (95% CI [3716.62, 13376.04]). Within this model:

- The effect of genotype [SCR] is statistically non-significant and negative (beta = -1080.08, 95% CI [-3975.20, 1815.04], t(12) = -0.81, p = 0.432, Std. beta = -0.25)

- The effect of actin intensity scaled is statistically non-significant and positive (beta = 382.43, 95% CI [-1528.20, 2293.06], t(12) = 0.44, p = 0.671, Std. beta = 0.09)

Emmeans

contrast estimate SE df lower.CL upper.CL t.ratio p.value

(MEF2C-KD) - SCR 1080 1430 9.22 -2153 4313 0.753 0.4703

Degrees-of-freedom method: kenward-roger

Confidence level used: 0.95

**LGALS3**

We fitted a linear mixed model to predict intensity with genotype and actin_intensity_scaled. The model included batch as random effects. The model's explanatory power related to the fixed effects

alone (marginal R2) is 0.48. The model's intercept is at 7404.37 (95% CI [4545.33, 10263.42]). Within this model:

- The effect of genotype [SCR] is statistically significant and negative (beta = -2813.74, 95% CI [-4702.12, -925.35], t(12) = -3.25, p = 0.007, Std. beta = -1.09)

- The effect of actin intensity scaled is statistically significant and positive (beta = 1319.06, 95% CI [100.96, 2537.17], t(12) = 2.36, p = 0.036, Std. beta = 0.51)

Emmeans

contrast estimate SE df lower.CL upper.CL t.ratio p.value

(MEF2C-KD) - SCR 2814 881 7.34 751 4877 3.195 0.0142

Degrees-of-freedom method: kenward-roger

Confidence level used: 0.95

**MEF2C**

We fitted a linear mixed model to predict intensity with genotype and actin_intensity_scaled. The model included batch as random effects. The model's explanatory power related to the fixed effects

alone (marginal R2) is 0.67. The model's intercept is at 8457.56 (95% CI [1905.25, 15009.86]). Within this model:

- The effect of genotype [SCR] is statistically significant and positive (beta = 6669.20, 95% CI [1829.63, 11508.77], t(12) = 3.00, p = 0.011, Std. beta = 0.80)

- The effect of actin intensity scaled is statistically non-significant and positive (beta = 2698.44, 95% CI [-214.14, 5611.01], t(12) = 2.02, p = 0.066, Std. beta = 0.32)

Emmeans

contrast estimate SE df lower.CL upper.CL t.ratio p.value

(MEF2C-KD) - SCR -6669 2360 8.53 -12043 -1295 -2.831 0.0207

Degrees-of-freedom method: kenward-roger

Confidence level used: 0.95

**PLIN2**

We fitted a linear mixed model to predict intensity with genotype and actin_intensity_scaled. The model included batch as random effects. The model's explanatory power related to the fixed effects

alone (marginal R2) is 0.26. The model's intercept is at 7049.92 (95% CI [4404.65, 9695.19]). Within this model:

- The effect of genotype [SCR] is statistically non-significant and negative (beta = -159.24, 95% CI [-3756.27, 3437.79], t(12) = -0.10, p = 0.925, Std. beta = -0.04)

- The effect of actin intensity scaled is statistically non-significant and negative (beta = -1638.32, 95% CI [-3725.80, 449.15], t(12) = -1.71, p = 0.113, Std. beta = -0.44)

Emmeans

contrast estimate SE df lower.CL upper.CL t.ratio p.value

(MEF2C-KD) - SCR 159 1800 10.2 -3831 4149 0.089 0.9311

Degrees-of-freedom method: kenward-roger

Confidence level used: 0.95

**Figure 9**

**Figure 9F: tMG cluster proportions**

**tMG_0**

We fitted a linear mixed model to predict Proportion with Genotype and Treatment. The model included Clone as random effect. The model's total explanatory power is substantial

(conditional R2 = 0.86) and the part related to the fixed effects alone (marginal R2) is of 0.52. The model's intercept is at 0.26 (95% CI [0.20, 0.31]). Within this model:

- The effect of Genotype [WT] is statistically non-significant and positive (beta = 0.01, 95% CI [-0.07, 0.09], t(10) = 0.30, p = 0.768, Std. beta = 0.16)

- The effect of Treatment [CTRL] is statistically significant and positive (beta = 0.12, 95% CI [0.08, 0.17], t(10) = 6.42, p < .001, Std. beta = 1.82)

- The effect of Genotype [WT] × Treatment [CTRL] is statistically significant and negative (beta = -0.12, 95% CI [-0.18, -0.06], t(10) = -4.35, p = 0.001, Std. beta = -1.74)

Emmeans:

contrast estimate SE df lower.CL upper.CL t.ratio p.value

KO AD - WT AD -0.01070 0.0353 8.07 -0.12363 0.10224 -0.303 0.9896

KO AD - KO CTRL -0.12478 0.0194 6.00 -0.19206 -0.05749 -6.420 0.0028

KO AD - WT CTRL -0.01603 0.0353 8.07 -0.12896 0.09691 -0.454 0.9671

WT AD - KO CTRL -0.11408 0.0353 8.07 -0.22701 -0.00115 -3.228 0.0478

WT AD - WT CTRL -0.00533 0.0194 6.00 -0.07261 0.06195 -0.274 0.9920

KO CTRL - WT CTRL 0.10875 0.0353 8.07 -0.00419 0.22168 3.077 0.0591

Degrees-of-freedom method: kenward-roger

Confidence level used: 0.95

Conf-level adjustment: tukey method for comparing a family of 4 estimates

P value adjustment: tukey method for comparing a family of 4 estimates

**tMG_1**

We fitted a linear mixed model to predict Proportion with Genotype and Treatment. The model included Clone as random effect. The model's total explanatory power is substantial

(conditional R2 = 0.85) and the part related to the fixed effects alone (marginal R2) is of 0.62. The model's intercept is at 0.13 (95% CI [0.10, 0.17]). Within this model:

- The effect of Genotype [WT] is statistically significant and positive (beta = 0.08, 95% CI [0.03, 0.13], t(10) = 3.52, p = 0.006, Std. beta = 1.60)

- The effect of Treatment [CTRL] is statistically non-significant and negative (beta = -0.02, 95% CI [-0.05, 5.50e-03], t(10) = -1.82, p = 0.098, Std. beta = -0.51)

- The effect of Genotype [WT] × Treatment [CTRL] is statistically non-significant and negative (beta = -0.02, 95% CI [-0.06, 0.02], t(10) = -1.00, p = 0.343, Std. beta = -0.40)

Emmeans:

contrast estimate SE df lower.CL upper.CL t.ratio p.value

KO AD - WT AD -0.0770 0.0219 8.7 -0.14576 -0.00821 -3.519 0.0288

KO AD - KO CTRL 0.0247 0.0136 6.0 -0.02222 0.07165 1.823 0.3488

KO AD - WT CTRL -0.0332 0.0219 8.7 -0.10195 0.03561 -1.516 0.4686

WT AD - KO CTRL 0.1017 0.0219 8.7 0.03292 0.17048 4.649 0.0059

WT AD - WT CTRL 0.0438 0.0136 6.0 -0.00312 0.09075 3.231 0.0654

KO CTRL - WT CTRL -0.0579 0.0219 8.7 -0.12666 0.01089 -2.646 0.1041

Degrees-of-freedom method: kenward-roger

Confidence level used: 0.95

Conf-level adjustment: tukey method for comparing a family of 4 estimates

P value adjustment: tukey method for comparing a family of 4 estimates

**tMG_2**

We fitted a linear mixed model to predict Proportion with Genotype and Treatment. The model included Clone as random effect. The model's total explanatory power is substantial

(conditional R2 = 0.51) and the part related to the fixed effects alone (marginal R2) is of 0.37. The model's intercept is at 0.12 (95% CI [0.11, 0.14]). Within this model:

- The effect of Genotype [WT] is statistically non-significant and positive (beta = 0.02, 95% CI [-4.89e-03, 0.04], t(10) = 1.76, p = 0.108, Std. beta = 1.06)

- The effect of Treatment [CTRL] is statistically non-significant and positive (beta = 0.01, 95% CI [-6.58e-03, 0.03], t(10) = 1.52, p = 0.160, Std. beta = 0.80)

- The effect of Genotype [WT] × Treatment [CTRL] is statistically non-significant and negative (beta = -1.78e-03, 95% CI [-0.03, 0.03], t(10) = -0.14, p = 0.895, Std. beta = -0.10)

Emmeans

contrast estimate SE df lower.CL upper.CL t.ratio p.value

KO AD - WT AD -0.01855 0.01050 11.4 -0.0500 0.012921 -1.763 0.3382

KO AD - KO CTRL -0.01407 0.00927 6.0 -0.0462 0.018018 -1.518 0.4831

KO AD - WT CTRL -0.03084 0.01050 11.4 -0.0623 0.000631 -2.931 0.0553

WT AD - KO CTRL 0.00448 0.01050 11.4 -0.0270 0.035948 0.426 0.9729

WT AD - WT CTRL -0.01229 0.00927 6.0 -0.0444 0.019799 -1.326 0.5812

KO CTRL - WT CTRL -0.01677 0.01050 11.4 -0.0482 0.014703 -1.594 0.4193

Degrees-of-freedom method: kenward-roger

Confidence level used: 0.95

Conf-level adjustment: tukey method for comparing a family of 4 estimates

P value adjustment: tukey method for comparing a family of 4 estimates

**tMG_3**

We fitted a linear mixed model to predict Proportion with Genotype and Treatment. The model included Clone as random effect. The model's total explanatory power is substantial

(conditional R2 = 0.79) and the part related to the fixed effects alone (marginal R2) is of 0.05. The model's intercept is at 0.10 (95% CI [0.06, 0.14]). Within this model:

- The effect of Genotype [WT] is statistically non-significant and negative (beta = -4.84e-03, 95% CI [-0.07, 0.06], t(10) = -0.18, p = 0.864, Std. beta = -0.13)

- The effect of Treatment [CTRL] is statistically non-significant and negative (beta = -0.02, 95% CI [-0.05, 0.01], t(10) = -1.41, p = 0.190, Std. beta = -0.51)

- The effect of Genotype [WT] × Treatment [CTRL] is statistically non-significant and positive (beta = 4.20e-03, 95% CI [-0.04, 0.05], t(10) = 0.23, p = 0.824, Std. beta = 0.12)

Emmeans

contrast estimate SE df lower.CL upper.CL t.ratio p.value

KO AD - WT AD 0.00484 0.0277 7.48 -0.0852 0.0949 0.175 0.9979

KO AD - KO CTRL 0.01831 0.0130 6.00 -0.0268 0.0634 1.406 0.5395

KO AD - WT CTRL 0.01895 0.0277 7.48 -0.0711 0.1090 0.685 0.8997

WT AD - KO CTRL 0.01347 0.0277 7.48 -0.0765 0.1035 0.487 0.9597

WT AD - WT CTRL 0.01411 0.0130 6.00 -0.0310 0.0592 1.083 0.7117

KO CTRL - WT CTRL 0.00064 0.0277 7.48 -0.0894 0.0907 0.023 1.0000

Degrees-of-freedom method: kenward-roger

Confidence level used: 0.95

Conf-level adjustment: tukey method for comparing a family of 4 estimates

P value adjustment: tukey method for comparing a family of 4 estimates

**tMG_4**

We fitted a linear mixed model to predict Proportion with Genotype and Treatment. The model included Clone as random effect. The model's total explanatory power is substantial

(conditional R2 = 0.74) and the part related to the fixed effects alone (marginal R2) is of 0.66. The model's intercept is at 0.13 (95% CI [0.11, 0.15]). Within this model:

- The effect of Genotype [WT] is statistically significant and negative (beta = -0.06, 95% CI [-0.10, -0.03], t(10) = -4.62, p < .001, Std. beta = -1.99)

- The effect of Treatment [CTRL] is statistically significant and negative (beta = -0.05, 95% CI [-0.08, -0.03], t(10) = -4.35, p = 0.001, Std. beta = -1.63)

- The effect of Genotype [WT] × Treatment [CTRL] is statistically significant and positive (beta = 0.05, 95% CI [0.02, 0.09], t(10) = 3.17, p = 0.010, Std. beta = 1.68)

Emmeans:

contrast estimate SE df lower.CL upper.CL t.ratio p.value

KO AD - WT AD 0.06412 0.0139 11.3 0.0225 0.1057 4.619 0.0033

KO AD - KO CTRL 0.05259 0.0121 6.0 0.0107 0.0945 4.349 0.0188

KO AD - WT CTRL 0.06253 0.0139 11.3 0.0210 0.1041 4.504 0.0039

WT AD - KO CTRL -0.01153 0.0139 11.3 -0.0531 0.0300 -0.830 0.8391

WT AD - WT CTRL -0.00159 0.0121 6.0 -0.0435 0.0403 -0.132 0.9991

KO CTRL - WT CTRL 0.00993 0.0139 11.3 -0.0316 0.0515 0.716 0.8889

Degrees-of-freedom method: kenward-roger

Confidence level used: 0.95

Conf-level adjustment: tukey method for comparing a family of 4 estimates

P value adjustment: tukey method for comparing a family of 4 estimates

**tMG_5**

We fitted a linear mixed model to predict Proportion with Genotype and Treatment. The model included Clone as random effect. The model's total explanatory power is substantial

(conditional R2 = 0.62) and the part related to the fixed effects alone (marginal R2) is of 0.43. The model's intercept is at 0.07 (95% CI [0.05, 0.09]). Within this model:

- The effect of Genotype [WT] is statistically non-significant and negative (beta = -0.02, 95% CI [-0.05, 9.72e-03], t(10) = -1.49, p = 0.167, Std. beta = -0.84)

- The effect of Treatment [CTRL] is statistically non-significant and positive (beta = 3.30e-03, 95% CI [-0.02, 0.03], t(10) = 0.31, p = 0.767, Std. beta = 0.14)

- The effect of Genotype [WT] × Treatment [CTRL] is statistically significant and positive (beta = 0.04, 95% CI [6.98e-03, 0.08], t(10) = 2.68, p = 0.023, Std. beta = 1.76)

Emmeans:

contrast estimate SE df lower.CL upper.CL t.ratio p.value

KO AD - WT AD 0.0197 0.0132 10.8 -0.0201 0.05942 1.491 0.4750

KO AD - KO CTRL -0.0033 0.0108 6.0 -0.0408 0.03418 -0.305 0.9892

KO AD - WT CTRL -0.0247 0.0132 10.8 -0.0645 0.01503 -1.877 0.2924

WT AD - KO CTRL -0.0230 0.0132 10.8 -0.0627 0.01681 -1.741 0.3502

WT AD - WT CTRL -0.0444 0.0108 6.0 -0.0819 -0.00691 -4.100 0.0245

KO CTRL - WT CTRL -0.0214 0.0132 10.8 -0.0612 0.01833 -1.626 0.4048

Degrees-of-freedom method: kenward-roger

Confidence level used: 0.95

Conf-level adjustment: tukey method for comparing a family of 4 estimates

P value adjustment: tukey method for comparing a family of 4 estimates

**tMG_6**

We fitted a linear mixed model to predict Proportion with Genotype and Treatment. The model included Clone as random effect. The model's total explanatory power is substantial

(conditional R2 = 0.62) and the part related to the fixed effects alone (marginal R2) is of 0.25. The model's intercept is at 0.07 (95% CI [0.03, 0.11]). Within this model:

- The effect of Genotype [WT] is statistically non-significant and positive (beta = 0.03, 95% CI [-0.03, 0.08], t(10) = 1.12, p = 0.287, Std. beta = 0.75)

- The effect of Treatment [CTRL] is statistically non-significant and negative (beta = -0.03, 95% CI [-0.07, 0.01], t(10) = -1.50, p = 0.165, Std. beta = -0.71)

- The effect of Genotype [WT] × Treatment [CTRL] is statistically non-significant and positive (beta = 5.47e-03, 95% CI [-0.05, 0.06], t(10) = 0.22, p = 0.834, Std. beta = 0.14)

Emmeans:

contrast estimate SE df lower.CL upper.CL t.ratio p.value

KO AD - WT AD -0.02841 0.0253 9.63 -0.1062 0.0494 -1.124 0.6840

KO AD - KO CTRL 0.02687 0.0179 6.00 -0.0352 0.0890 1.498 0.4929

KO AD - WT CTRL -0.00701 0.0253 9.63 -0.0848 0.0708 -0.277 0.9921

WT AD - KO CTRL 0.05527 0.0253 9.63 -0.0225 0.1331 2.188 0.1940

WT AD - WT CTRL 0.02140 0.0179 6.00 -0.0407 0.0835 1.193 0.6525

KO CTRL - WT CTRL -0.03388 0.0253 9.63 -0.1117 0.0439 -1.341 0.5607

Degrees-of-freedom method: kenward-roger

Confidence level used: 0.95

Conf-level adjustment: tukey method for comparing a family of 4 estimates

P value adjustment: tukey method for comparing a family of 4 estimates

**tMG_7**

We fitted a linear mixed model to predict Proportion with Genotype and Treatment. The model included Clone as random effect. The model's total explanatory power is substantial

(conditional R2 = 0.88) and the part related to the fixed effects alone (marginal R2) is of 0.60. The model's intercept is at 0.06 (95% CI [0.05, 0.08]). Within this model:

- The effect of Genotype [WT] is statistically significant and negative (beta = -0.05, 95% CI [-0.07, -0.02], t(10) = -3.99, p = 0.003, Std. beta = -1.85)

- The effect of Treatment [CTRL] is statistically non-significant and negative (beta = -0.01, 95% CI [-0.03, 3.52e-03], t(10) = -1.68, p = 0.123, Std. beta = -0.44)

- The effect of Genotype [WT] × Treatment [CTRL] is statistically non-significant and positive (beta = 0.02, 95% CI [-4.38e-03, 0.04], t(10) = 1.75, p = 0.111, Std. beta = 0.64)

Emmeans:

contrast estimate SE df lower.CL upper.CL t.ratio p.value

KO AD - WT AD 0.04604 0.01150 8.15 0.00926 0.08283 3.991 0.0163

KO AD - KO CTRL 0.01087 0.00646 6.00 -0.01148 0.03323 1.684 0.4063

KO AD - WT CTRL 0.04095 0.01150 8.15 0.00416 0.07773 3.549 0.0300

WT AD - KO CTRL -0.03517 0.01150 8.15 -0.07196 0.00161 -3.048 0.0610

WT AD - WT CTRL -0.00509 0.00646 6.00 -0.02745 0.01726 -0.789 0.8571

KO CTRL - WT CTRL 0.03008 0.01150 8.15 -0.00671 0.06686 2.607 0.1145

Degrees-of-freedom method: kenward-roger

Confidence level used: 0.95

Conf-level adjustment: tukey method for comparing a family of 4 estimates

P value adjustment: tukey method for comparing a family of 4 estimates

**tMG_8**

We fitted a linear mixed model to predict Proportion with Genotype and Treatment. The model included Clone as random effect. The model's total explanatory power is substantial

(conditional R2 = 0.54) and the part related to the fixed effects alone (marginal R2) is of 0.24. The model's intercept is at 0.02 (95% CI [0.01, 0.03]). Within this model:

- The effect of Genotype [WT] is statistically non-significant and positive (beta = 4.62e-03, 95% CI [-7.19e-03, 0.02], t(10) = 0.87, p = 0.404, Std. beta = 0.58)

- The effect of Treatment [CTRL] is statistically non-significant and negative (beta = -6.16e-03, 95% CI [-0.02, 3.07e-03], t(10) = -1.49, p = 0.168, Std. beta = -0.78)

- The effect of Genotype [WT] × Treatment [CTRL] is statistically non-significant and positive (beta = 4.45e-03, 95% CI [-8.59e-03, 0.02], t(10) = 0.76, p = 0.465, Std. beta = 0.56)

Emmeans:

contrast estimate SE df lower.CL upper.CL t.ratio p.value

KO AD - WT AD -0.00462 0.00530 10.4 -0.02071 0.01147 -0.871 0.8193

KO AD - KO CTRL 0.00616 0.00414 6.0 -0.00817 0.02049 1.487 0.4982

KO AD - WT CTRL -0.00291 0.00530 10.4 -0.01900 0.01318 -0.549 0.9447

WT AD - KO CTRL 0.01077 0.00530 10.4 -0.00532 0.02686 2.034 0.2368

WT AD - WT CTRL 0.00171 0.00414 6.0 -0.01262 0.01604 0.412 0.9743

KO CTRL - WT CTRL -0.00907 0.00530 10.4 -0.02516 0.00702 -1.711 0.3656

Degrees-of-freedom method: kenward-roger

Confidence level used: 0.95

Conf-level adjustment: tukey method for comparing a family of 4 estimates

P value adjustment: tukey method for comparing a family of 4 estimates

**tMG_9**

We fitted a linear mixed model to predict Proportion with Genotype and Treatment. The model included Clone as random effect. The model's explanatory power related to the fixed

effects alone (marginal R2) is 0.22. The model's intercept is at 0.02 (95% CI [8.56e-03, 0.03]). Within this model:

- The effect of Genotype [WT] is statistically non-significant and negative (beta = -4.34e-03, 95% CI [-0.02, 0.01], t(10) = -0.67, p = 0.516, Std. beta = -0.46)

- The effect of Treatment [CTRL] is statistically non-significant and negative (beta = -6.00e-05, 95% CI [-0.01, 0.01], t(10) = -9.30e-03, p = 0.993, Std. beta = -6.31e-03)

- The effect of Genotype [WT] × Treatment [CTRL] is statistically non-significant and positive (beta = 0.01, 95% CI [-7.30e-03, 0.03], t(10) = 1.43, p = 0.184, Std. beta = 1.37)

Emmeans:

contrast estimate SE df lower.CL upper.CL t.ratio p.value

KO AD - WT AD 0.00434 0.00645 12 -0.0148 0.02350 0.673 0.9053

KO AD - KO CTRL 0.00006 0.00645 6 -0.0223 0.02239 0.009 1.0000

KO AD - WT CTRL -0.00863 0.00645 12 -0.0278 0.01053 -1.337 0.5587

WT AD - KO CTRL -0.00428 0.00645 12 -0.0234 0.01487 -0.664 0.9087

WT AD - WT CTRL -0.01297 0.00645 6 -0.0353 0.00937 -2.010 0.2817

KO CTRL - WT CTRL -0.00869 0.00645 12 -0.0278 0.01047 -1.346 0.5533

Degrees-of-freedom method: kenward-roger

Confidence level used: 0.95

Conf-level adjustment: tukey method for comparing a family of 4 estimates

P value adjustment: tukey method for comparing a family of 4 estimates

**tMG_10**

We fitted a linear mixed model to predict Proportion with Genotype and Treatment. The model included Clone as random effect. The model's explanatory power related to the fixed

effects alone (marginal R2) is 0.08. The model's intercept is at 5.03e-03 (95% CI [1.19e-03, 8.87e-03]). Within this model:

- The effect of Genotype [WT] is statistically non-significant and negative (beta = -2.50e-04, 95% CI [-5.68e-03, 5.18e-03], t(10) = -0.10, p = 0.920, Std. beta = -0.08)

- The effect of Treatment [CTRL] is statistically non-significant and negative (beta = -2.57e-03, 95% CI [-8.00e-03, 2.87e-03], t(10) = -1.05, p = 0.317, Std. beta = -0.79)

- The effect of Genotype [WT] × Treatment [CTRL] is statistically non-significant and positive (beta = 1.93e-03, 95% CI [-5.76e-03, 9.61e-03], t(10) = 0.56, p = 0.589, Std. beta =

0.59)

Emmeans

contrast estimate SE df lower.CL upper.CL t.ratio p.value

KO AD - WT AD 0.000250 0.00244 12 -0.00699 0.00749 0.103 0.9996

KO AD - KO CTRL 0.002566 0.00244 6 -0.00587 0.01101 1.053 0.7278

KO AD - WT CTRL 0.000891 0.00244 12 -0.00635 0.00813 0.366 0.9825

WT AD - KO CTRL 0.002317 0.00244 12 -0.00492 0.00955 0.950 0.7791

WT AD - WT CTRL 0.000641 0.00244 6 -0.00780 0.00908 0.263 0.9930

KO CTRL - WT CTRL -0.001675 0.00244 12 -0.00891 0.00556 -0.687 0.9000

Degrees-of-freedom method: kenward-roger

Confidence level used: 0.95

Conf-level adjustment: tukey method for comparing a family of 4 estimates

P value adjustment: tukey method for comparing a family of 4 estimates

**Figure 9I: Ab40 Ab42 species**

**Ab42/40 ratio**

We fitted a linear mixed model to predict ratio_mean with genotype. The model included clone as random effects. The model's explanatory power related

to the fixed effects alone (marginal R2) is 0.60. The model's intercept is at 1.15 (95% CI [1.03, 1.27]). Within this model:

- The effect of genotype [KO] is statistically significant and negative (beta = -0.44, 95% CI [-0.58, -0.30], t(25) = -6.56, p < .001, Std. beta =

-1.45)

Emmeans

contrast estimate SE df lower.CL upper.CL t.ratio p.value

WT - KO 0.438 0.0775 2.7 0.175 0.701 5.649 0.0145

Degrees-of-freedom method: kenward-roger

Confidence level used: 0.95

**Ab40**
We fitted a linear mixed model to predict ab40_z_mean with genotype and total_protein_z_mean. The model included clone as random effects. The model's

total explanatory power is substantial (conditional R2 = 0.93) and the part related to the fixed effects alone (marginal R2) is of 0.39. The model's

intercept is at -0.06 (95% CI [-0.67, 0.55]). Within this model:

- The effect of genotype [KO] is statistically non-significant and positive (beta = 0.40, 95% CI [-0.34, 1.14], t(24) = 1.12, p = 0.274, Std. beta =

0.39)

- The effect of total protein z mean is statistically significant and positive (beta = 0.54, 95% CI [0.25, 0.83], t(24) = 3.86, p < .001, Std. beta =

0.47)

Emmeans

WT - KO -0.402 0.361 5.31 -1.31 0.509 -1.115 0.3129

Degrees-of-freedom method: kenward-roger

Confidence level used: 0.95

**Ab42**

We fitted a linear mixed model to predict ab42_z_mean with genotype and total_protein_z_mean. The model included clone as random effects. The model's

total explanatory power is substantial (conditional R2 = 0.94) and the part related to the fixed effects alone (marginal R2) is of 0.33. The model's

intercept is at 0.33 (95% CI [-0.38, 1.03]). Within this model:

- The effect of genotype [KO] is statistically non-significant and negative (beta = -0.35, 95% CI [-1.22, 0.52], t(24) = -0.83, p = 0.417, Std. beta

= -0.34)

- The effect of total protein z mean is statistically significant and positive (beta = 0.62, 95% CI [0.33, 0.90], t(24) = 4.44, p < .001, Std. beta =

0.54)

Emmeans

contrast estimate SE df lower.CL upper.CL t.ratio p.value

WT - KO 0.348 0.422 5.34 -0.717 1.41 0.825 0.4449

Degrees-of-freedom method: kenward-roger

Confidence level used: 0.95

**Figure 9H: CD9 intensity**

We fitted a linear mixed model to predict cd9_int_den_per_object with genotype and re_n_cell. The model included clone as random effects. The model's explanatory power related to the

fixed effects alone (marginal R2) is 0.69. The model's intercept is at 1.55e+05 (95% CI [56424.05, 2.53e+05]). Within this model:

- The effect of genotype [KO] is statistically non-significant and positive (beta = 6072.75, 95% CI [-47808.64, 59954.14], t(102) = 0.22, p = 0.824, Std. beta = 0.04)

- The effect of re n cell [AD] is statistically significant and positive (beta = 1.65e+05, 95% CI [1.15e+05, 2.15e+05], t(102) = 6.52, p < .001, Std. beta = 1.08)

- The effect of genotype [KO] × re n cell [AD] is statistically significant and positive (beta = 68439.46, 95% CI [176.52, 1.37e+05], t(102) = 1.99, p = 0.049, Std. beta = 0.45)

Emmeans:

contrast estimate SE df lower.CL upper.CL t.ratio p.value

WT CTRL - KO CTRL -6073 29900 12.82 -93890 81744 -0.203 0.9969

WT CTRL - WT AD -165191 26500 53.06 -235494 -94887 -6.232 <.0001

WT CTRL - KO AD -239703 31300 11.89 -332793 -146613 -7.655 <.0001

KO CTRL - WT AD -159118 30900 10.99 -252036 -66199 -5.154 0.0015

KO CTRL - KO AD -233630 26800 48.66 -305009 -162251 -8.707 <.0001

WT AD - KO AD -74512 30600 7.69 -173367 24342 -2.436 0.1497

Degrees-of-freedom method: kenward-roger

Confidence level used: 0.95

Conf-level adjustment: tukey method for comparing a family of 4 estimates

P value adjustment: tukey method for comparing a family of 4 estimates
